## **The Kinetochores Protein KNL-1 Regulates Actin Cytoskeleton Dynamics to Promote Dendrite Branching in Sensory Neurons**

Mattie Green<sup>1</sup>, Henrique Alves Domingos<sup>1</sup>, Vasilis Ouzounidis<sup>1</sup>, Cameron Finlayson<sup>1</sup>, Bram Prevo<sup>1</sup> & Dhanya K. Cheerambathur<sup>1\*</sup>

<sup>1</sup>Wellcome Centre for Cell Biology & Institute of Cell Biology, School of Biological Sciences,  
The University of Edinburgh, Edinburgh, EH9 3BF, UK

@: Corresponding author

Email: [dhanya.cheerambathur@ed.ac.uk](mailto:dhanya.cheerambathur@ed.ac.uk)

## ABSTRACT

1 Precise control of dendrite branching is essential for the formation of neural circuits, yet the  
2 mechanisms that regulate this process remain poorly understood. Here we show that the  
3 kinetochore protein KNL-1, known for its role in chromosome-microtubule coupling during  
4 mitosis, together with its binding partners, the KMN network, regulate dendritic branching in  
5 the *C. elegans* mechanosensory neuron, PVD, in a cell division independent manner. Neuron-  
6 specific degradation of KNL-1 results in excess dendrite branching and fusion events,  
7 predisposes PVD to age-dependent degeneration, and impairs animal sensory behavior.  
8 Surprisingly, these effects are not attributable to mis-regulation of the microtubule  
9 cytoskeleton. Instead, KNL-1 degradation alters the dynamics of F-actin, an established  
10 driver of dendrite branching. Epistasis analysis shows that KNL-1 counters the activity of the  
11 RacGEF TIAM-1, a downstream effector of dendrite guidance receptors. These findings  
12 establish that the microtubule coupling KMN network promotes dendrite branching by  
13 regulating the actin cytoskeleton and provide insight into how the cytoskeleton shapes  
14 dendritic architecture.

**KEY WORDS:** cytoskeleton, actin, microtubule, kinetochore, dendrite, neurodevelopment,  
dendrite morphogenesis, dendrite arborization, KNL-1, TIAM-1, PVD neuron

## INTRODUCTION

15 Neurons have specialized compartments for transmitting information, including dendrites,  
16 which receive & integrate signals, and axons, which propagate them. The shape, size and  
17 trajectory of dendritic and axonal processes determines how a neuron communicates and  
18 functions. Dendrites display diverse shapes and complex branching patterns that are unique  
19 to neuronal types<sup>1</sup>. The dendrite arborization pattern defines how input signals are distributed  
20 and integrated, ultimately shaping the functional properties of neurons and their connectivity  
21 within the neural circuits. Proper development and organization of dendritic arbors is therefore  
22 crucial for establishing the neural circuits, which regulate animal behavior. Notably,  
23 alterations in dendrite morphology and organization are associated with several  
24 neurodevelopmental & neurodegenerative disorders <sup>2</sup>.

25 Dendrite morphogenesis initiates when extrinsic guidance cues interact with specific  
26 cell surface receptors on the neuron and activate intracellular signaling pathways that trigger  
27 cytoskeletal rearrangements to enable dendrite growth and branching <sup>2</sup>. The Rho family of  
28 GTPases (Cdc-42, Rac1, and RhoA) are key downstream effectors of the guidance cues  
29 during dendrite development<sup>3-6</sup>. Rho GTPases influence dendrite arborization by regulating  
30 actin filament assembly and the formation of actin structures such as filopodia and  
31 lamellipodia. During dendrite outgrowth, dynamic actin filaments form a network of  
32 lamellipodial and filopodial protrusions that guide and propel the growth cone. Dendritic  
33 arborization occurs when filopodia emerge from preexisting branches and undergo extension  
34 and retraction until they become stabilized<sup>7</sup>. Consequently, dendrite arbor growth and  
35 stabilization entail extensive actin remodeling and careful coordination between actin growth  
36 states and structures. Various actin regulators, including F-actin nucleators modulators of F-  
37 actin dynamics, have been shown to affect dendrite morphogenesis <sup>8,9</sup>. However, it is unclear

38 how the activity of different actin regulators is coordinated and controlled spatially &  
39 temporally by the Rho GTPases to generate a specific dendrite pattern.

40         The microtubule cytoskeleton is also critical for dendrite morphogenesis. Microtubules  
41 provide structural support for dendrites and serve as tracks to transport key building materials  
42 and organelles. Mutations in molecular motors that affect transport severely impair dendrite  
43 morphology, and loss of microtubules-associated proteins result in dendrite development  
44 defects<sup>10–14</sup>. In addition, microtubule nucleators are found at branch points of developing  
45 dendrites, where they organize microtubule arrays to regulate branching<sup>15</sup>. Studies on the  
46 role of microtubules in dendritic spines, small actin-rich protrusions on dendrite branches that  
47 are sites of high synaptic activity, have shown that dynamic microtubules enter the actin-rich  
48 spines in a synaptic-activity-dependent manner and that this is facilitated by actin  
49 cytoskeleton remodeling<sup>12,16,17</sup>. Thus, a crosstalk between the two cytoskeletal structures  
50 appears to exist within dendrites, but its molecular basis remains elusive.

51         Recent studies have revealed that kinetochore proteins, which connect chromosomes  
52 to dynamic spindle microtubules in dividing cells, also play an unexpected post-mitotic role  
53 during neurodevelopment. The conserved 10-subunit Knl1 complex/Mis12 complex/Ndc80  
54 complex (KMN) network, which serves as the primary chromosome-microtubule coupler<sup>18,19</sup>,  
55 is enriched along developing dendrites of *C. elegans* sensory neurons and in the synapses  
56 and axons of *D. melanogaster* neurons<sup>20,21</sup>. Depletion of any KMN component in *C. elegans*  
57 sensory neurons results in dendrite growth defects, indicating that KMN function is critical for  
58 dendrite development. Knockdown of Mis12 causes dendrite branching defects in *D.*  
59 *melanogaster* embryonic sensory neurons and increases filopodial protrusions in dendrites  
60 of rat hippocampal neurons, underscoring the importance of the Mis12 complex for proper  
61 dendrite formation. Moreover, kinetochore proteins promote dendrite regeneration of *D.*



62 *melanogaster* sensory neurons, highlighting their involvement in the maintenance of dendrite  
63 morphology<sup>22</sup>.

64 The mechanisms by which kinetochore proteins contribute to dendrite development  
65 and maintenance is not understood, but some observations imply that microtubule binding  
66 activity is important<sup>20,22</sup>. The neuronal function of KMN network in *C. elegans* sensory  
67 neurons depends on the microtubule coupling interface within the Ndc80 complex.  
68 Additionally, knockdown of kinetochore proteins in *D. melanogaster* sensory neurons  
69 increases the number of microtubule plus ends in dendrites, suggesting a role in the  
70 regulation of microtubule dynamics<sup>22</sup>.

71 Our previous characterization of the KMN network's post mitotic role in neurons  
72 focused on dendrite extensions of the *C. elegans* amphid sensory neuron bundles, which  
73 consist of 12 dendrites from 12 neurons<sup>20</sup>. This precluded a detailed analysis of cellular  
74 structures within dendrites at the single-neuron level. To overcome this limitation, we have  
75 examined the role of KNL-1 during dendrite branching of the mechanosensory neuron PVD.  
76 Dendrite development in PVD is stereotypical and invariant, and its cytoskeletal organization  
77 is well characterized, making it a good system to investigate kinetochore protein function. In  
78 this study we demonstrate that KNL-1 is concentrated in the extending dendrites processes  
79 and at branch points, and that PVD-specific degradation of KNL-1 perturbs higher order  
80 branch formation, leading to behavioral defects and premature neurodegeneration.  
81 Surprisingly, KNL-1 degradation does not affect microtubule organization or dynamics, but  
82 instead up-regulates F-actin assembly in the cell body and primary dendrites. We show that  
83 KNL-1 acts antagonistically to the RacGEF TIAM-1, the downstream effector of dendrite  
84 branching cues. Thus, the kinetochore protein KNL-1 contributes to the dendrite guidance  
85 pathway through regulation of the neuronal actin cytoskeleton.

## RESULTS

### 86 **KNL-1 localizes to developing dendrites in the PVD neuron**

87 The PVD neuron in *C. elegans* is a type of mechanosensory neuron located between the  
88 body wall muscle and the epidermis of the animal. A unique feature of the PVD is the highly  
89 arborized dendrites that extend throughout the animal's body. (**Figure 1A**). PVD dendrites  
90 form a distinctive branching pattern composed of non-overlapping repeating units called  
91 "menorahs", which are important for integrating and processing sensory inputs (**Figure 1A**)<sup>23</sup>.  
92 PVD dendrite branches are established during the larval stages and the branching follows a  
93 stereotypical developmental program that begins at the late L2 larval stage and concludes by  
94 the late L4 larval stage (**Figure S1A**). To visualize the localization of the kinetochore protein  
95 KNL-1 in the PVD neuron, we used a split-GFP system<sup>24</sup>. The N-terminus of KNL-1 was fused  
96 to 7 copies of the  $\beta$ 11 strand of GFP at the endogenous locus, and the complementing GFP  
97 1-10 was expressed under a PVD-specific promoter. The cell body of PVD is located near  
98 the animal tail, and two primary (1°) dendrites extend from the cell body towards the anterior  
99 and posterior. KNL-1 was enriched in the cell body and along the extending 1° dendrites at  
100 the L2 larval stage (**Figure 1B**). During the L3 and L4 stages, higher order branches develop  
101 from the 1° dendrite to generate the distinctive menorah shape. KNL-1 signal persisted along  
102 the 1° dendrites in the L3 and L4 stages but became more punctate (**Figure S1B**). We also  
103 observed discrete KNL-1 puncta at the base of branch points of 2° dendrite and 3° dendrites,  
104 as well as along the newly formed 3° dendrites (**Figures 1C, 2D & S1B-D**). These results  
105 indicated that KNL-1 may play a role in PVD dendrite formation.

### **KNL-1 functions cooperatively with the KMN network to restrict dendritic branching**

106 To investigate the function of KNL-1 in the PVD neuron, we utilized an auxin inducible degron  
107 (AID) to selectively degrade KNL-1 in the PVD neuron (KNL-1 degrader). We fused an AID  
108 peptide sequence along with GFP to KNL-1 at the endogenous locus and expressed the plant  
109 specific F-box protein TIR1 under PVD-specific promoters (**Figure 2A**)<sup>25,26</sup>. To degrade KNL-  
110 1, we synchronized the worms as L1 larvae and exposed them to auxin at the L2 stage when  
111 PVD development is initiated (**Figure S2A**). We observed a significant reduction in  
112 GFP::KNL-1 signal from the PVD cell body at the L2 stage (**Figure 2A**). To assess the effect  
113 of KNL-1 degradation on PVD development, we visualized dendrite morphology in L4 larvae  
114 by expressing a plasma membrane (pleckstrin homology domain, PH) marker. Both control  
115 and KNL-1 degrader neurons exhibited proper extension of their 1° dendrites. However, we  
116 observed a significant disruption of the higher-order branching pattern following KNL-1  
117 degradation (**Figures 2B & S2F**). Menorahs consist of dendrite branches that are arranged  
118 at right angles with respect to each other. Specifically, each menorah contains a 2° dendrite  
119 that branches off at a right angle from the 1° dendrite, which then gives rise to an orthogonal  
120 3° branch that forms the base of menorah. Finally, several smaller 4° dendrites emerge at  
121 right angles to the 3° dendrite to complete the menorah. The number of 2° dendrite branches  
122 was not significantly different between control and KNL-1 degrader neurons (**Figure S2B**).  
123 However, KNL-1 degrader neurons exhibited an increased number of 4° dendrite branches  
124 (**Figure 2C**), an increased number of fusion events between 3° dendrites (**Figure 2D**), and  
125 an increased number of ectopic neurites originating from the 1° dendrites (**Figure S2C**).

126 We next overexpressed KNL-1 in the PVD neuron by generating extrachromosomal  
127 arrays that contain multiple copies of transgenic KNL-1::GFP under a PVD-specific promoter.  
128 Compared to control animals that contained a GFP-expressing plasmid in the array, animals

129 with KNL-1::GFP arrays exhibited a decrease in higher-order branching. Specifically, the  
130 number of 2° and 4° dendrite branches were significantly reduced (**Figures 2H, 2I & S2J**).  
131 We conclude that PVD-specific degradation and overexpression of KNL-1 have opposite  
132 effects on higher-order dendritic branching.

133 We also investigated the effect of degrading the Mis12 and the Ndc80 complexes  
134 within the KMN network on PVD branching. Degradation of KNL-3 (a component of the Mis12  
135 complex) or Ndc80 disrupted PVD dendrite architecture in a similar manner to KNL-1  
136 degradation (**Figure S2E-I**). Taken together, these results reveal that PVD-localized KNL-1  
137 functions in the context of the KMN network to restrict dendritic branching. We conclude that  
138 the kinetochore-microtubule coupling machinery has a crucial role in ensuring proper PVD  
139 dendrite arborization.

### **KNL-1 regulates the dynamics and stability of dendrite branches**

140 A prominent effect of KNL-1 degradation is the fusion of neighboring menorahs resulting from  
141 the merging or overlap of 3° dendrites (**Figure 2D**). In control neurons, 3° dendrites of  
142 neighboring menorahs do not overlap with each other because they quickly retract after  
143 contacting each other. The aberrant fusion observed following KNL-1 degradation and the  
144 presence of GFP::KNL-1 puncta along the 3° dendrite and at branch points within the  
145 menorah (**Figures 1C & S2I**) suggests that KNL-1 plays a role in resolving contacts between  
146 the growing tips of neighboring 3° dendrites. To understand how KNL-1 contributes to the  
147 spatial separation of menorahs, we tracked the growth dynamics of 3° dendrites. Consistent  
148 with previous studies<sup>23,27</sup>, 3° dendrites of neighboring menorahs retracted within 5-10 min of  
149 mutual contact in control neurons (**Figure 2E, 2G**). In KNL-1 degrader neurons, the frequency  
150 with which neighboring 3° dendrites established contact remained unchanged (**Figure S2D**)

151 but contact duration was longer (**Figure 2G**). The presence of persistent contacts after KNL-  
152 1 degradation resulted in a higher frequency of unresolved fusions, indicating that KNL-1  
153 function ensures timely retraction of 3° dendrites during menorrh formation (**Figure 2F**).  
154 These observations suggest that KNL-1 regulates the dynamics and stability of dendrite  
155 branches to establish the highly ordered branching pattern of PVD neurons.

### **KNL-1 degradation impairs function and lifespan of the PVD neuron**

156 As KNL-1 function is essential for proper dendrite arborization in the PVD neuron, we next  
157 examined the sensory behavior of KNL-1 degrader animals. Proprioception, awareness of  
158 body position and movement, is attributed to PVD dendrites that sense mechanical stimuli  
159 and provide feedback to the body wall muscles to generate a stereotypical sinusoidal  
160 locomotory pattern (**Figure 3A**). To determine the body posture of animals, we visualized  
161 their movement on food and measured wavelength and amplitude of their sinusoidal tracks.  
162 As a positive control, we used animals lacking DMA-1, a transmembrane receptor that is  
163 essential for PVD dendrite formation. KNL-1 degrader animals showed reduced amplitudes  
164 and wavelengths, indicating that degradation of KNL-1 in the PVD neuron impairs  
165 proprioception (**Figures 3A - C**).

166 Analysis of PVD morphology at the L4 stage revealed that dendrites of KNL-1  
167 degrader neurons contained more bead-like structures compared to control neurons (**Figures**  
168 **3D, 3E**). Beading is implicated in age-dependent decline of PVD dendrites<sup>28</sup>, and substantial  
169 beading does not appear until late into adulthood (Day 6) in control neurons. The presence  
170 of substantial beading at the L4 stage suggested that KNL-1 degrader neurons degenerate  
171 prematurely. Age-dependent degeneration of PVD dendrites is mediated by the autophagy  
172 pathway<sup>28</sup>, and autophagosomes marked by mScarlet-I::LGG-1 were enriched in dendrites

173 of KNL-1 degrader neurons at the day 1 adult stage (**Figure 3F, 3G**). These observations  
174 suggest that KNL-1 degradation predisposes the PVD neuron to premature ageing.

### **KNL-1 degradation does not perturb PVD polarity, microtubule organization, or microtubule dynamics**

175 The canonical role of KMN network proteins is to stabilize the interactions between  
176 chromosomes and microtubules during chromosome segregation. Microtubule function and  
177 stability are also critical for the establishment and maintenance of neuronal polarity in the  
178 PVD neuron<sup>11,29,30</sup>. Therefore, we hypothesized that KNL-1 could affect PVD dendrite  
179 branching by regulating the underlying microtubule architecture and neuronal polarity. To  
180 determine whether KNL-1 degradation impacts PVD polarity, we assessed the distribution of  
181 RAB-3, a small GTPase associated with synaptic vesicles, and DMA-1, which localizes  
182 exclusively to dendrites (**Figure 4A**). We observed no change in the distribution of either  
183 RAB-3 or DMA-1 following KNL-1 degradation, indicating that PVD polarity remains intact  
184 (**Figure 4B 4C & S3A, S3B**).

185 Next, we investigated whether KNL-1 degradation impacts the distribution, dynamics,  
186 or stability of microtubules in the 1° anterior dendrite. To monitor microtubule orientation and  
187 dynamics we imaged the microtubule plus end-tracking protein EB1<sup>EBP-2</sup>, which binds to  
188 growing microtubule plus ends. EB1<sup>EBP-2</sup>::GFP was expressed under a PVD-specific  
189 promoter, and its trajectories were followed by time-lapse imaging in L4 larvae (**Figure 4D**).  
190 In control neurons, the majority of the EB1<sup>EBP-2</sup>::GFP puncta moved towards the cell body,  
191 which is consistent with previous observations<sup>10,31</sup> that within the 1° anterior dendrite  
192 microtubules are oriented with their minus end distal (**Figure 4D & 4E**). There was no  
193 significant difference in the direction of movement, velocity, or frequency of EB1<sup>EBP-2</sup>::GFP

194 comets in KNL-1 degrader neurons (**Figure 4D, 4E & S3D, S3E**). Thus, KNL-1 does not  
195 contribute to the orientation, distribution, or dynamics of microtubule plus ends within PVD  
196 dendrites.

197 We also examined tubulin distribution and microtubule stability in PVD dendrites by  
198 expressing an  $\alpha$ -tubulin GFP-fusion protein. GFP::TBA-1 is enriched in 1° dendrites and is  
199 not detectable in higher-order dendrite branches of control animals, and this distribution was  
200 not affected by KNL-1 degradation (**Figure S3C**). To assess the stability of microtubules, we  
201 performed Fluorescence Recovery After Photobleaching (FRAP) experiments on  
202 microtubules labeled with endogenous GFP::TBA-1 using the split-gfp system (**Figure 4F**).  
203 After KNL-1 degradation, microtubules within the 1° anterior dendrite recovered to a similar  
204 extent (~20%) and with the same kinetics as microtubules in control neurons (**Figure 4F &**  
205 **S3F**). Recovery kinetics indicate that microtubules in the 1° anterior dendrite are largely  
206 stable, and that microtubule stability is not impaired by KNL-1 degradation. Overall, these  
207 experiments indicate that altered neuronal polarity or perturbed microtubule organization and  
208 dynamics are unlikely to account for the striking effect of KNL-1 loss on PVD dendritic  
209 branching and consequent impairment of PVD neuron function and lifespan.

### **KNL-1 limits F-actin assembly and dynamics in the PVD cell body and dendrites**

210 During our analysis of PVD morphology, we noticed that the cell body in KNL-1 degrader  
211 animals was enlarged and deformed (**Figure 5A, 5B**), suggestive of defects associated with  
212 the actin cytoskeleton. To visualize the actin cytoskeleton during PVD dendrite branching, we  
213 generated a strain expressing Lifeact, the actin binding peptide of the yeast protein Abp140,  
214 fused to mKate2 under a PVD-specific promoter. We imaged actin and the plasma membrane  
215 of the PVD neuron at the L4 stage, when 4° dendritic branches are beginning to form. In

216 control neurons, Lifeact::mKate2 signal is enriched in the 3° and 4° dendrites compared to  
217 the 1° dendrites and the cell body, consistent with previous observations<sup>32,33</sup> that newly  
218 formed dendrites show a higher concentration of F-actin (**Figure 5C**). In KNL-1 degrader  
219 neurons, Lifeact::mKate2 signal intensity in the cell body and proximal 1° dendrites was  
220 significantly increased (**Figure 5C**), and close examination revealed prominent F-actin cables  
221 in the cell body of KNL-1 degrader neurons (**Figure 5D-G & S4A-C**). These results suggest  
222 that degradation of KNL-1 during PVD development results in increased F-actin levels.

223 To assess F-actin dynamics, we performed FRAP in the 1° anterior dendrite. In both  
224 control and KNL-1 degrader neurons, recovery of Lifeact::mKate2 signal was slow suggesting  
225 a low turnover rate for F-actin. However, the extent of recovery was significantly lower in KNL-  
226 1 degrader neurons (8% vs. 14% in controls) indicative of a higher fraction of stable F-actin  
227 structures (**Figure 5H, 5I**).

228 Consistent with a role for KNL-1 in regulating F-actin dynamics, we found that KNL-1  
229 influences the dynamics of filopodial protrusions from 1° dendrites. 2° dendrite branches  
230 initiate when several actin-rich filopodial like projections extend orthogonally from the 1°  
231 dendrite. Most of these filopodia undergo several cycles of extension and retraction until a  
232 subset of projections stabilize to form the 2° dendrites (**Figure S4D**). The number of filopodial  
233 protrusions from 1° dendrites was significantly increased in KNL-1 degrader neurons (**Figure**  
234 **5J, 5K & S4D**). Unlike the filopodial outgrowths in control dendrites, which extend  
235 orthogonally for a short period, protrusions in KNL-1 degrader dendrites had a longer lifetime  
236 and arbitrary trajectories, often running parallel to 1° dendrites (**Figure 4SD**). These  
237 observations suggest that KNL-1 plays a critical role in regulating filopodial generation and  
238 dynamics in 1° dendrites.



### **KNL-1 acts antagonistically to the RacGEF TIAM-1 to promote dendrite branching**

239 Since KNL-1 regulates F-actin and dendrite branch dynamics as well as menorah formation,  
240 we investigated how it connects with the molecular pathway that controls F-actin remodeling  
241 and dendrite branching. Dendrite branching is driven by actin polymerization, which is  
242 triggered by Rho family GTPases activated in response to guidance cues<sup>9</sup>. Specifically, the  
243 adhesion molecules L1CAM/SAX-7 and MNR-1 in the epidermis interact with DMA-1/LRR,  
244 the dendrite guidance receptor on the surface of the PVD neuron to initiate the formation of  
245 3° and 4° branches. Within the PVD neuron, DMA-1 in conjunction with HPO-30, the claudin-  
246 like transmembrane protein, functions as a scaffold for the RacGEF TIAM-1 and the Arp2/3  
247 complex activator WRC (Wave Regulatory Complex) to promote actin assembly and drive  
248 dendrite branching (**Figure 6A**). To determine whether KNL-1 acts in the DMA-1-mediated  
249 F-actin assembly pathway, we performed epistasis analysis of PVD-specific KNL-1  
250 degradation with mutants in the *dma-1*-mediated branching pathway. Deletion of *dma-1*  
251 results in complete loss of branching and menorah formation. Combining KNL-1 degradation  
252 with a *dma-1Δ* mutant resulted in a similar phenotype as *dma-1Δ* alone, suggesting that KNL-  
253 1 functions downstream of DMA-1.

254 We next tested the genetic interaction between KNL-1 and TIAM-1. TIAM-1 is  
255 essential for higher order branching, as *tiam-1Δ* PVD neurons exhibit “immature” menorahs  
256 that lack 4° branches (**Figure 6B, 6C**). KNL-1 degradation in the PVD suppressed the  
257 branching defects observed in *tiam-1Δ* animals and led to complete restoration of the  
258 menorahs and the 3° and 4° branch counts (**Figure 6B-D**). This suggests that KNL-1  
259 degradation compensates for the loss of *tiam-1* by promoting dendrite branching. Additionally,  
260 the menorah fusion defects observed in KNL-1 degrader neurons were reduced in *tiam-1Δ*

261 animals, indicating that KNL-1 and TIAM-1 have opposing effects on menohah formation  
262 **(Figure 6E).**

263 TIAM-1 is a RacGEF proposed to locally recruit active Rac to initiate F-actin assembly.  
264 Interestingly, in addition to the suppression of branching defects, *tiam-1Δ* also suppressed  
265 the cell body shape defects of KNL-1 degrader neurons **(Figure 6F, 6G)**. Consistent with this  
266 rescue, we found that F-actin levels in the cell body were no longer increased when KNL-1  
267 was degraded in the *tiam-1Δ* background **(Figure 6G-I)**. Given that *tiam-1Δ* rescued F-actin  
268 levels in KNL-1 degrader neurons, we were surprised to find that *tiam-1Δ* on its own increased  
269 F-actin levels to a similar extent as KNL-1 degradation **(Figure 6G-I)**. This indicates that  
270 TIAM-1 does not solely function as a GEF that promotes actin polymerization, and further  
271 work will be necessary to understand the role of TIAM-1 in F-actin regulation and its epistatic  
272 effect with KNL-1 degradation. Overall, these results demonstrate that KNL-1 and TIAM-1 act  
273 antagonistically to modulate actin polymerization dynamics to promote the branching and  
274 proper patterning of dendrite architecture of the PVD neuron.

## DISCUSSION

275 Dendrite morphogenesis is a highly orchestrated process that requires precise regulation of  
276 the actin and microtubule cytoskeleton. Various effectors of cytoskeletal remodeling in  
277 dendrites have been identified, but how effector functions are coordinated to generate the  
278 unique dendrite pattern of each neuron remains largely undefined. Taking advantage of the  
279 unique morphology of the PVD neuron and a PVD-specific protein-degradation system, we  
280 show that the kinetochore component KNL-1 facilitates dendrite arborization, and that it does  
281 so in the context of the KMN network, the microtubule-coupling machine that drives  
282 chromosome segregation during cell division.

283 KNL-1 degradation does not appreciably affect microtubule organization or growth  
284 dynamics in PVD dendrites, nor does it affect PVD polarity, which is consistent with  
285 observations in *D. melanogaster* sensory neurons<sup>22</sup>. KNL-1 degradation also has no effect  
286 on the abundance of EB1-marked microtubule plus ends, which contrasts with the increased  
287 number of EB1 comets observed after knockdown of Ndc80 and Mis12 subunits in *D.*  
288 *melanogaster* neurons. KNL-1 function therefore appears to differ significantly from that of  
289 other known microtubule-associated proteins in PVD, whose inhibition primarily affects  
290 neuronal polarity or microtubule orientation and stability<sup>10,29,30,34</sup>.

291 Taken together, our results argue against the idea that KNL-1 facilitates dendrite  
292 branching through regulation of the microtubule cytoskeleton. Instead, we unexpectedly  
293 found that KNL-1 degradation increases F-actin levels in the cell body and primary dendrites  
294 and promotes formation of filopodial protrusions from primary dendrites, which suggested to  
295 us that KNL-1 might regulate actin filament dynamics. Furthermore, the observed increase in  
296 filopodial protrusions after Mis12 knockdown in rat hippocampal neurons is consistent with  
297 the idea that other components of the KMN network may also affect the actin cytoskeleton<sup>21</sup>.  
298 It remains to be determined whether KNL-1's effect on actin requires association of the KMN  
299 network with microtubules. We note, however, that KNL-1 does not appear to be specifically  
300 enriched at microtubule-based structures (data not shown), and that fluorescence microscopy  
301 suggests microtubules are absent in 3° and 4° dendrites, where KNL-1 presumably acts  
302 during dendrite branching<sup>11,35</sup>.

303 Recent studies suggest that dendrite branching results from a balance of F-actin-  
304 dependent dendrite growth and retraction, and our time lapse analysis shows that KNL-1  
305 degradation primarily inhibits branch retraction<sup>27,35</sup>. At the molecular level, dendrite branching  
306 in PVD is driven by synergistic interaction between DMA-1, the transmembrane guidance

307 receptor, and HPO-30, the claudin superfamily member<sup>32,33</sup>. DMA-1 & HPO-30 are thought  
308 to independently recruit the WAVE regulatory complex (WRC) to promote Arp2/3 mediated  
309 assembly of branched F-actin networks, with DMA-1 recruiting WRC via the RacGEF TIAM-  
310 1, and HPO-30 recruiting WRC directly through its C-terminal domain. TIAM-1 is essential to  
311 form 3° & 4° branching<sup>32,33</sup>, and we show that KNL-1 degradation rescues the branching  
312 defects observed in *tiam-1Δ*. Moreover, the KNL-1 degradation phenotype in PVD is similar  
313 to that of TIAM-1 or DMA-1 overexpression. This suggests that KNL-1 functions in the DMA-  
314 1 pathway and promotes dendrite branching by antagonizing TIAM-1-mediated F-actin  
315 assembly. A parsimonious explanation would be that KNL-1 counters the GEF activity of  
316 TIAM-1. However, this is contradicted by the observation that the GEF activity of TIAM-1 is  
317 not essential for dendrite branching.

318 An emerging view is that a balance between linear and branched actin filaments  
319 underlies the transition from extension to retraction of the growing 3° dendrites<sup>35</sup>.  
320 Interestingly, previous work showed that Formin, a nucleator of linear actin filaments, is  
321 enriched at kinetochores of human cultured cells and contributes to the stability of  
322 kinetochore-attached microtubules during mitosis in mammalian cells and during meiosis in  
323 oocytes<sup>36–38</sup>. Moreover, a recent study showed that F-actin cables generated by Formin and  
324 Spire, another nucleator of linear actin filaments, interact with kinetochores during porcine  
325 oocyte meiosis<sup>39</sup>. Given this close link between kinetochores and Formin, an attractive  
326 hypothesis to be tested in the future is that the PVD-localized KMN network regulates linear  
327 F-actin assembly during dendrite outgrowth, thereby ensuring the balance between linear and  
328 branched F-actin filaments required for proper dendrite arborization.

## **ACKNOWLEDGMENTS**

329 We thank Reto Gassmann and Rebecca Green for comments on the manuscript. This work  
330 is supported by a Sir Henry Wellcome Postdoctoral Fellowship (215925) to B.P. and a Sir  
331 Henry Dale Fellowship (208833) to D.K.C. Imaging was performed in Centre Optical  
332 Instrumentation Laboratory (COIL), which is supported by a Core Grant (203149) to the  
333 Wellcome Centre for Cell Biology at the University of Edinburgh. Some strains were provided  
334 by the CGC, which is funded by NIH Office of Research Infrastructure Programs (P40  
335 OD010440)

## **DECLARATION OF INTERESTS**

336 The authors declare no competing interests.

## Figure 1

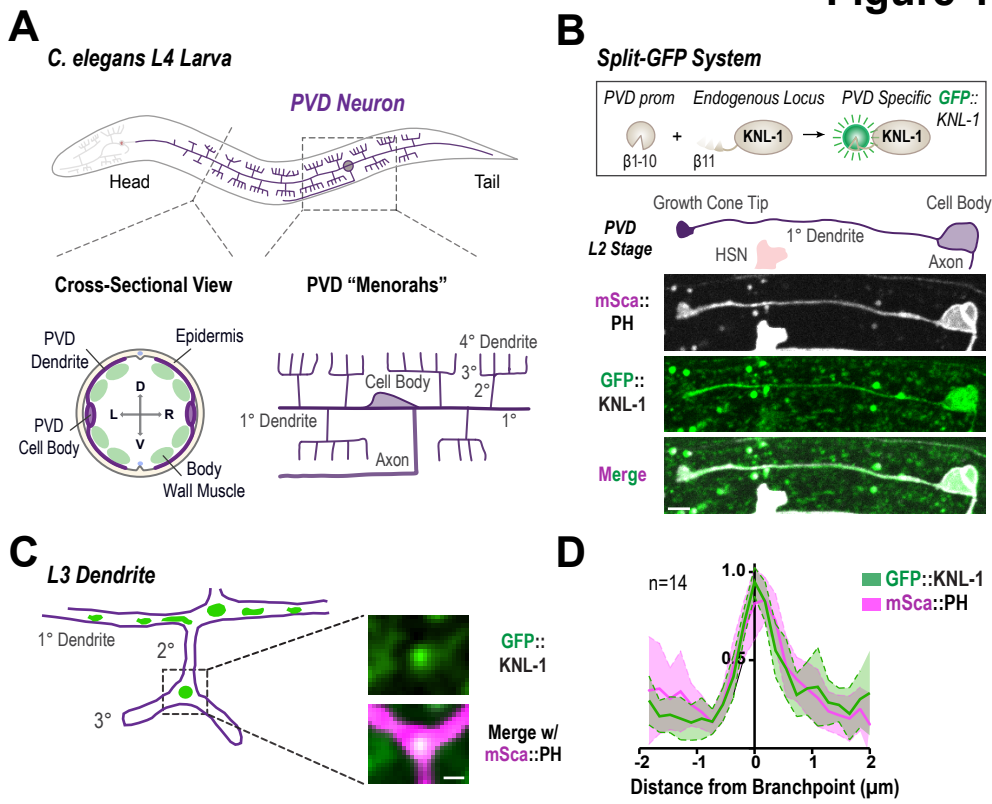

**Figure 1. KNL-1 localisation in the PVD neuron.**

337 **(A)** Schematic of the PVD neuron at the L4 larval stage. The left inset cartoon shows a cross-  
338 sectional view of PVD between the epidermis and body wall muscle. The right inset illustrates  
339 the discrete “menorah”-like dendrite branching pattern of the PVD neuron. **(B)** Localization of  
340 GFP::KNL-1 expressed specifically in PVD neuron using a split-GFP system. The image  
341 represents an L2 stage PVD neuron which has begun to extend its anterior dendrite. Scale  
342 bar, 5µm. **(C)** An example, with a schematic, of GFP::KNL-1 localizing at the developing  
343 branch points in an L3 stage PVD dendrite. Scale Bar, 1µm. **(D)** Quantification of GFP::KNL-  
344 1 at the intersections of 2° and 3° dendrites as shown in (C).

345

## Figure 2

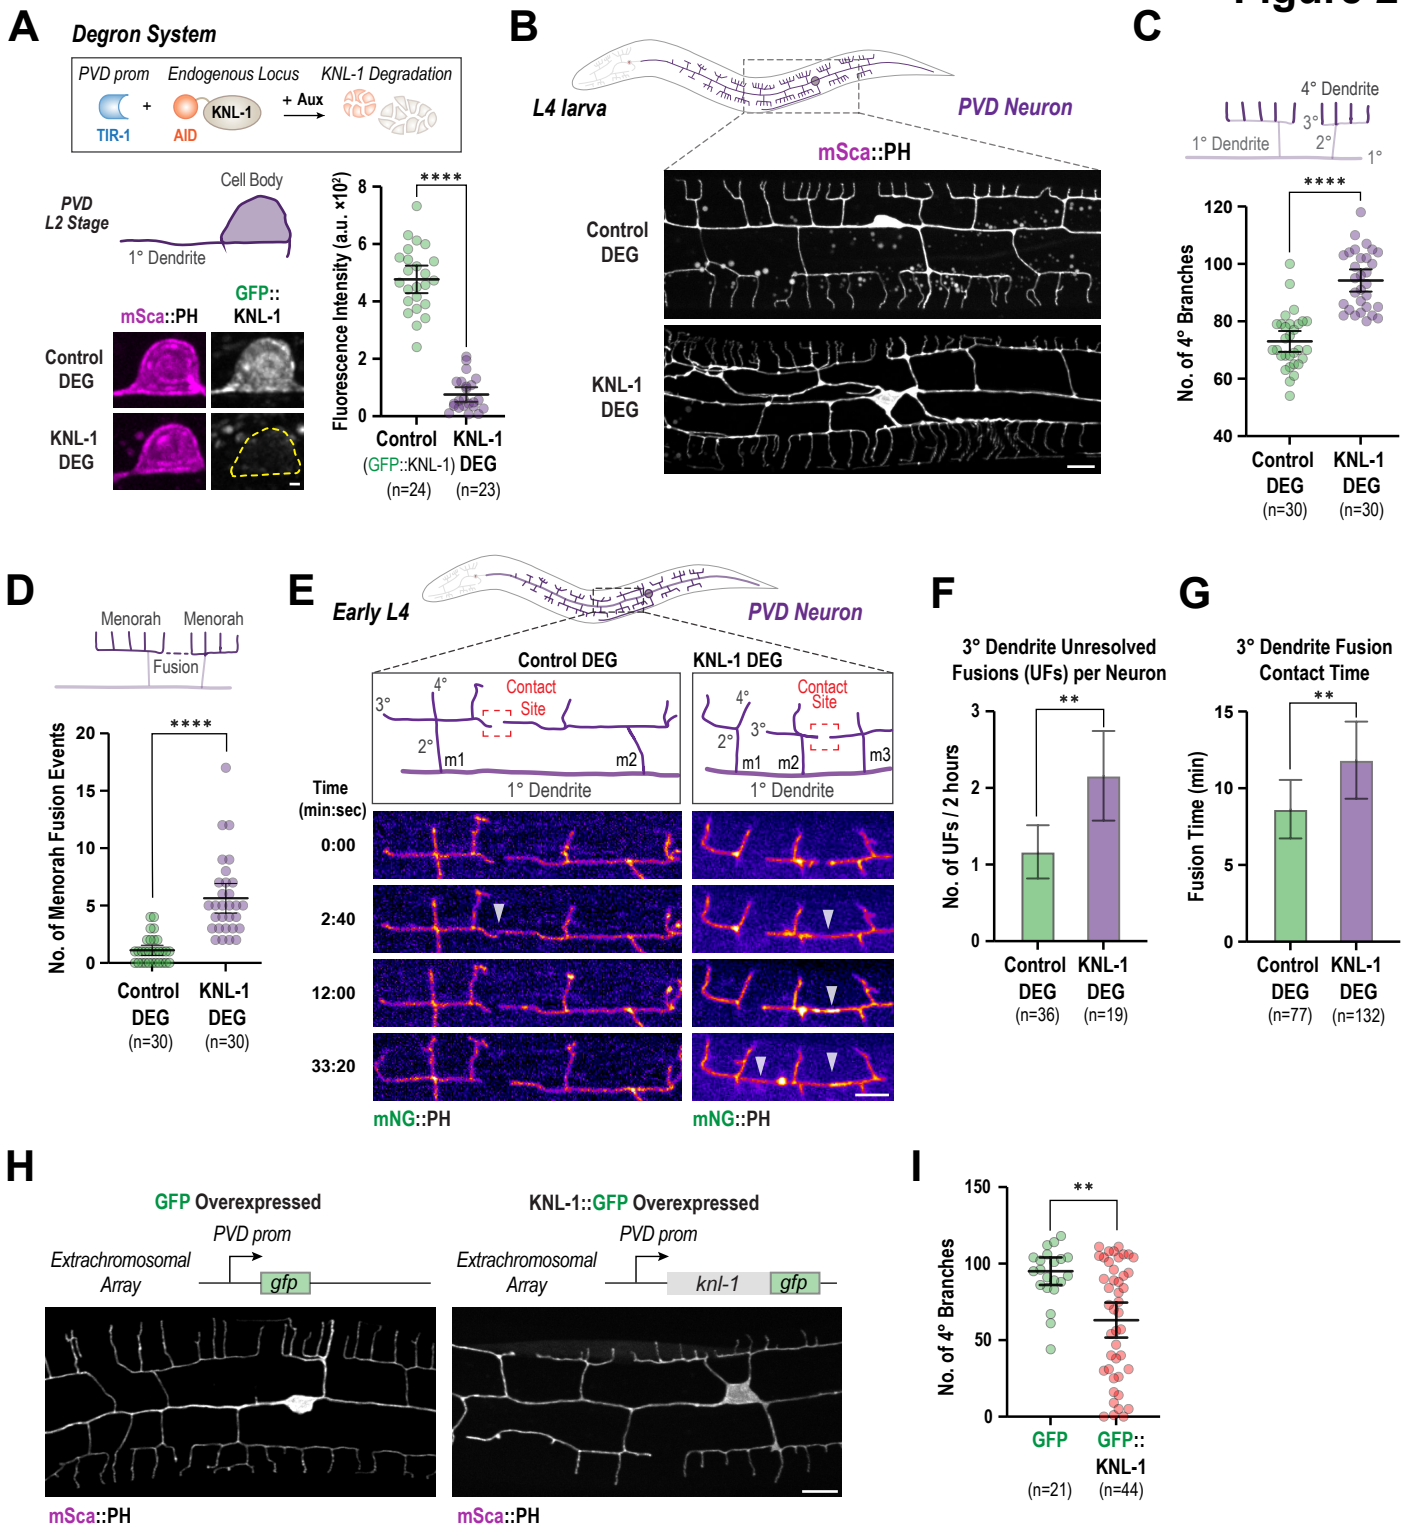



346 **Figure 2. KNL-1 is required for proper dendrite branching of the PVD neuron.**

347 **(A)** Approach used to degrade endogenously tagged AID::KNL-1 in the PVD neuron (top).  
348 Images below show loss of GFP::KNL-1 signal in presence of PVD-specific Tir1 transgene &  
349 auxin. The plot on the right shows the mean fluorescence intensity of the GFP signal in the  
350 cell body for control & KNL-1 DEG. Scale bar, 1 $\mu$ m. **(B)** Images of PVD dendrite organization  
351 in the control (top) & KNL-1 DEG (bottom). Scale bar, 10 $\mu$ m. **(C&D)** Quantification of PVD  
352 dendrite organization in terms of 4 $^\circ$  branch count and fusion between menorahs in control &  
353 KNL-1 DEG. **(E)** Stills from time-lapse imaging of 3 $^\circ$  dendrite branch dynamics in control &  
354 KNL-1 DEG animals. White arrow heads denote fusion events between two adjacent  
355 menorahs. Scale bar, 5 $\mu$ m. **(F)** Quantification of the number of fusion events between 3 $^\circ$   
356 dendrites of two adjacent menorahs that remained unresolved during the time lapse. n  
357 corresponds to the total number of animals analyzed in each condition. **(G)** Quantification of  
358 time spent in contact by 3 $^\circ$  dendrites of two adjacent menorahs. n corresponds to the total  
359 events analyzed in control animals and KNL-1 DEG animals. **(H)** Images of PVD in control  
360 (GFP) (left) & KNL-1 GFP overexpressing animals (right). Scale bars, 10 $\mu$ m. **(I)** Quantification  
361 of the number of 4 $^\circ$  branches in the PVD in control (GFP) and KNL-1::GFP overexpressing  
362 animals.

363

## Figure 3

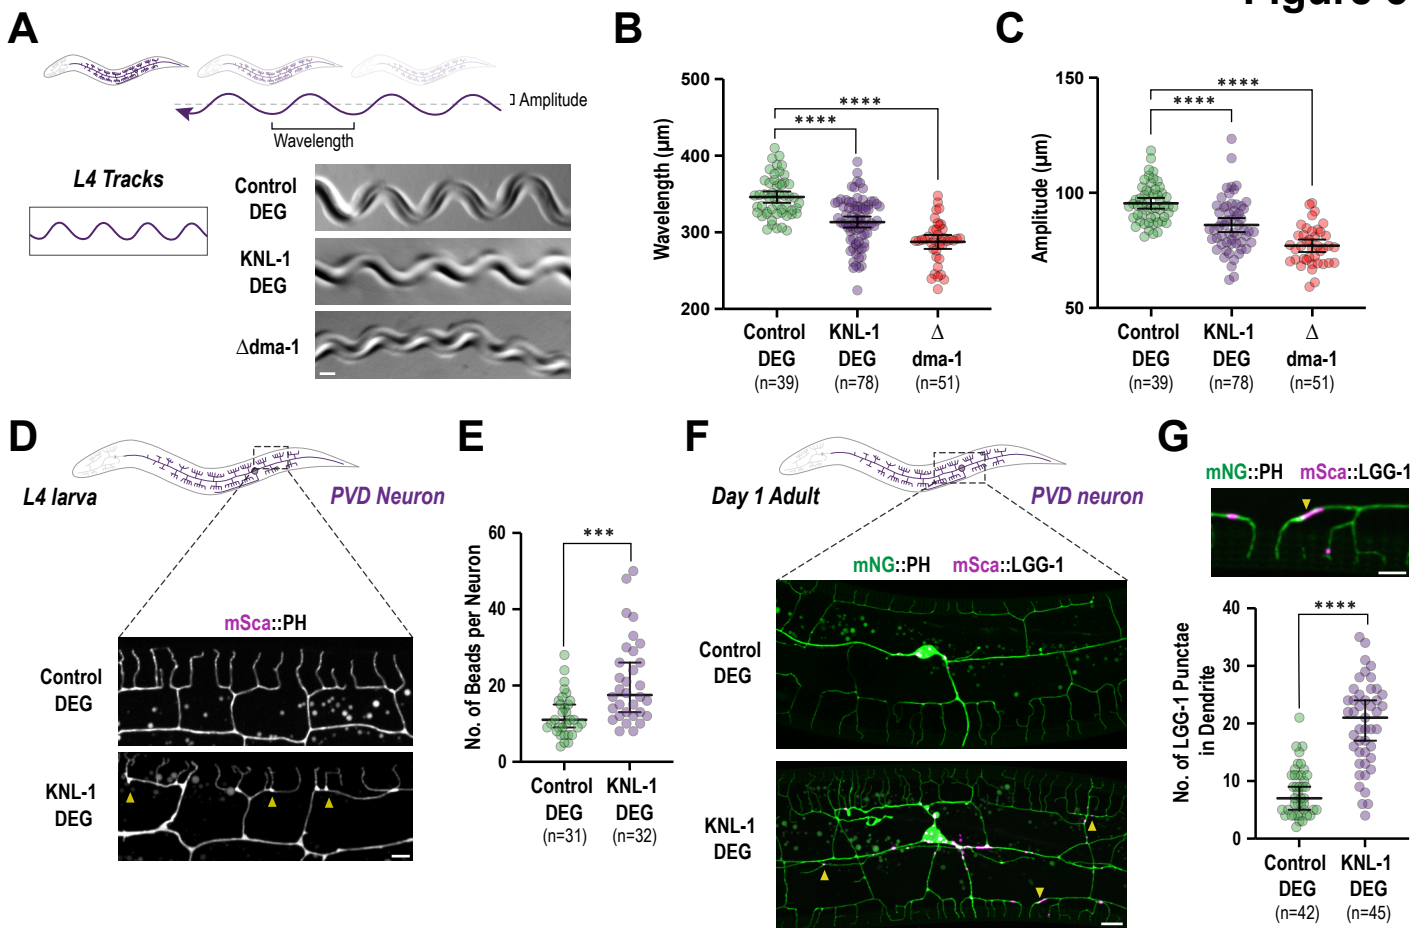

364 **Figure 3. KNL-1 is important for proprioceptive behavior and PVD neuron maintenance.**  
365 **(A)** Proprioception behavior analysis. Representative tracks of animals in indicated  
366 conditions. The wild type control worms form sinusoidal tracks. Scale bar, 20 $\mu$ m **(B&C)**  
367 Quantification of the wavelength and amplitude of the tracks by animals in indicated  
368 conditions. **(D)** Images of PVD dendrite organization in the control (top) & KNL-1 DEG  
369 (bottom) animals. Yellow arrowhead indicates the bead-like blebs seen with membranes.  
370 Scale bar, 5 $\mu$ m. **(E)** Quantification of the bead-like blebs in control and KNL-1 DEG animals.  
371 **(F)** Autophagosomes labeled with the marker mScarlet-I::LGG-1 overlaid with membrane  
372 (mNeonGreen::PH) in control & KNL-1 DEG adult animals. Yellow arrowheads indicate the  
373 appearance of LGG-1 puncta along the dendrites. Scale bar, 10 $\mu$ m. **(G)** Quantification of  
374 mScarlet-I::LGG-1 puncta in the dendrites in control & KNL-1 DEG animals. Yellow  
375 arrowhead indicates an LGG-1 puncta. Scale bar, 5 $\mu$ m.  
376

## Figure 4

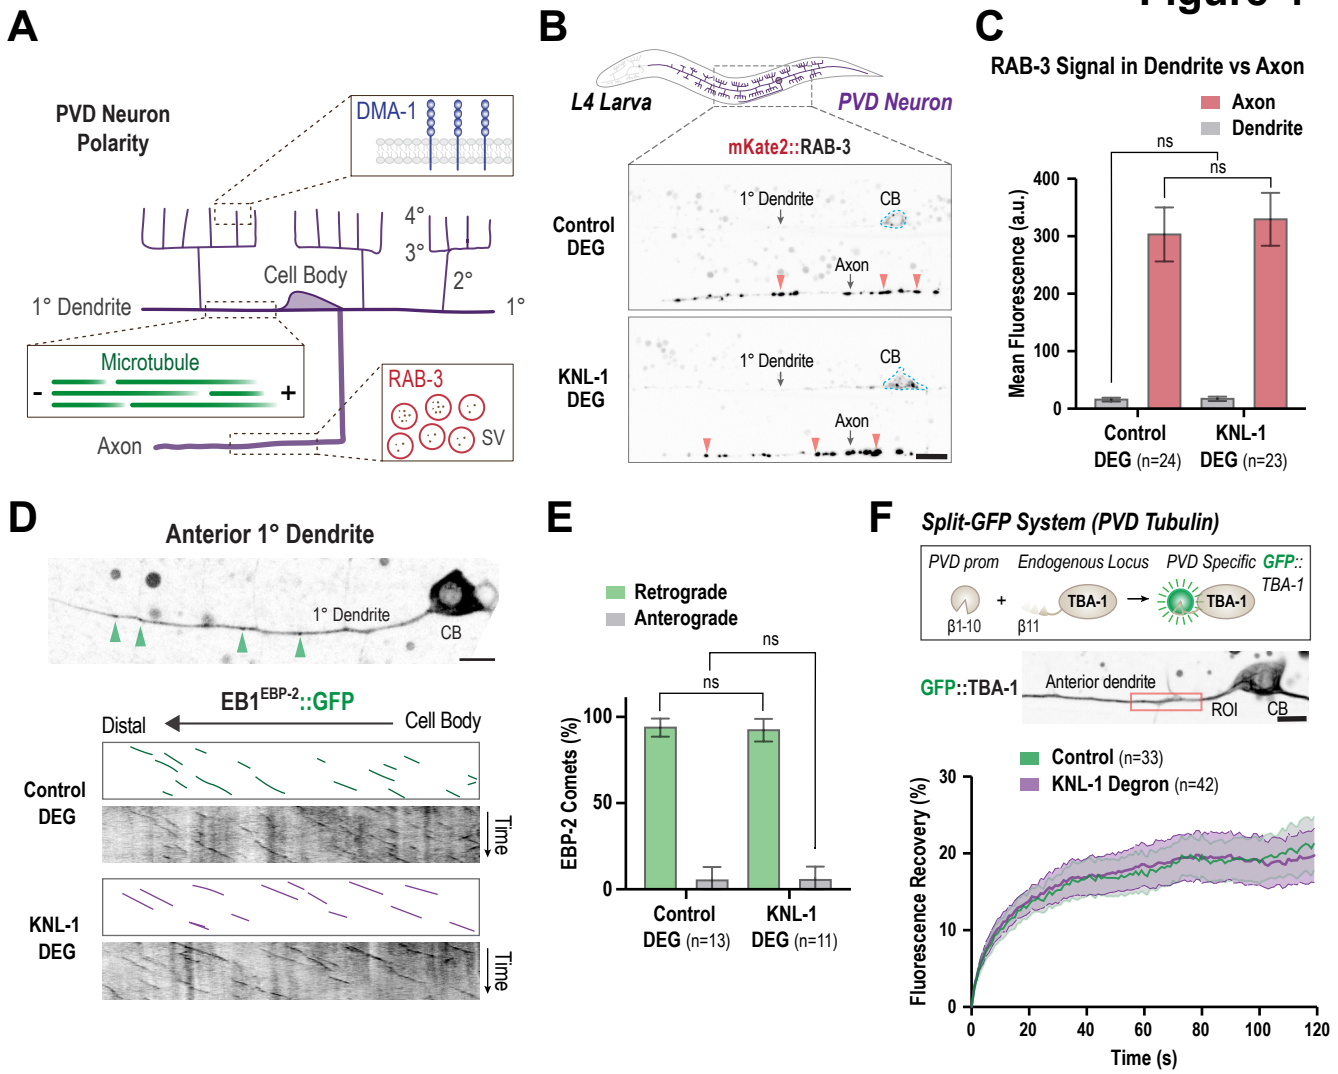

377 **Figure 4. PVD neuronal polarity & microtubule organization are not affected by post-**  
378 **mitotic degradation of KNL-1.**

379 **(A)** Schematic showing DMA-1, the dendrite specific receptor, RAB-3, the synaptic vesicle  
380 (SV) marker & the anterior dendrite microtubule organization. **(B)** Localization of the synaptic  
381 marker RAB-3 in control & KNL-1 DEG. RAB-3 is enriched in the axon (see red arrowheads).  
382 Scale bar, 5 $\mu$ m. **(C)** Quantification of RAB-3 fluorescent signal in the dendrite & axon. **(D)**  
383 EB1<sup>EBP-2</sup>::GFP dynamics in the anterior primary dendrite. Plus end comets (arrowhead) are  
384 highlighted in the top still image. Below are kymographs projection images of the control (top)  
385 & KNL-1 DEG. The kymograph was generated along line extending from cell body towards  
386 the distal end of the primary dendrite. Scale bar, 5 $\mu$ m. **(E)** Quantification of EB1<sup>EBP-2</sup>::GFP  
387 comet dynamics in control & KNL-1 DEG. **(F)** (Top) Schematic of an endogenous GFP::TBA-  
388 1 fusion expressed specifically in PVD using a split-gfp system. (middle) Still image of the  
389 anterior primary dendrite that expresses the split-GFP::TBA-1. The red rectangle indicates  
390 the Region of Interest (ROI) that was bleached in the FRAP experiments. CB is cell body.  
391 Scale bar, 5 $\mu$ m (Bottom) GFP::TBA-1 fluorescence recovery plots for control & KNL-1 DEG.  
392

## Figure 5

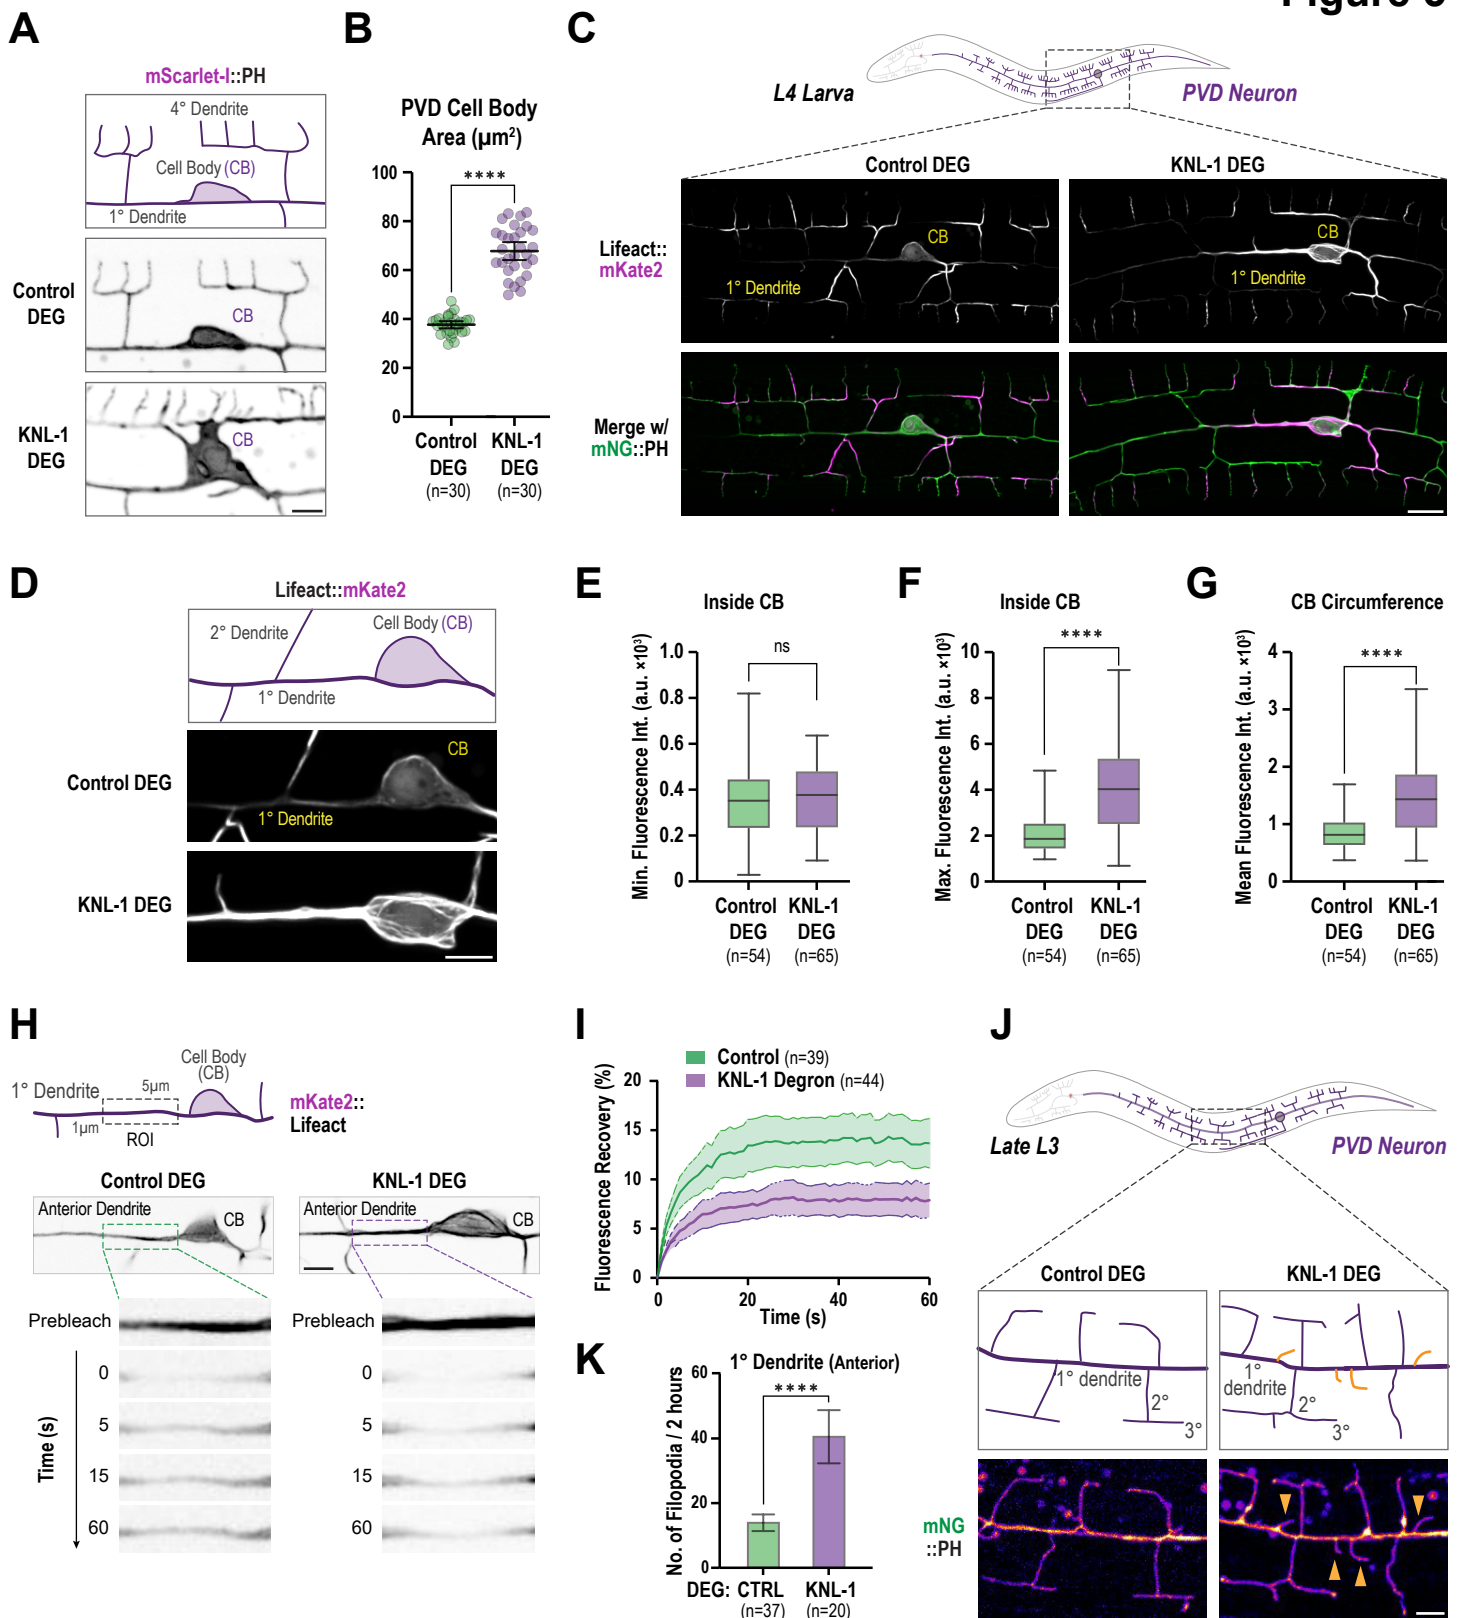

393 **Figure 5. The PVD cell body shows an increase in polymerized actin after KNL-1**  
394 **degradation.**

395 **(A)** Images of the PVD cell body and proximal regions in control and KNL-DEG. Scale bar,  
396 5 $\mu$ m. **(B)** Quantification of the area of the cell body in control & KNL-1 DEG animals. **(C)** The  
397 top image shows actin labeled with mKate2::Lifeact while the bottom shows actin overlaid  
398 with membrane (mNeonGreen::PH) in control & KNL-1 DEG animals. Scale bar, 10 $\mu$ m. **(D)**  
399 Images highlighting actin distribution in the cell body (CB) and proximal anterior primary  
400 dendrite in control (top) and KNL-1 DEG (bottom) animals. Scale bar, 5  $\mu$ m. **(E-G)**  
401 Quantification of Lifeact fluorescence intensity inside and on the periphery of the cell body.  
402 **(H)** (Top) Still images of the PVD anterior primary dendrite expressing mKate2::Lifeact in  
403 control & KNL-1 DEG animals The dashed rectangles indicate the Region of Interests (ROIs)  
404 that were bleached in the FRAP experiments. (Bottom) Prebleach and postbleach images of  
405 mKate2::Lifeact in control & KNL-1 DEG animals. Scale bar, 5 $\mu$ m. **(I)** mKate2::Lifeact  
406 fluorescence recovery plots for control & KNL-1 DEG animals. **(J)** Images of anterior primary  
407 dendrite labeled with mNeonGreen::PH in control & KNL-1 DEG late L3 stage animals. Yellow  
408 arrowheads indicate filopodia. Scale bar, 5 $\mu$ m. **(K)** Quantification of the filopodial protrusions  
409 from anterior primary dendrite during a two-hour time lapse.

## Figure 6

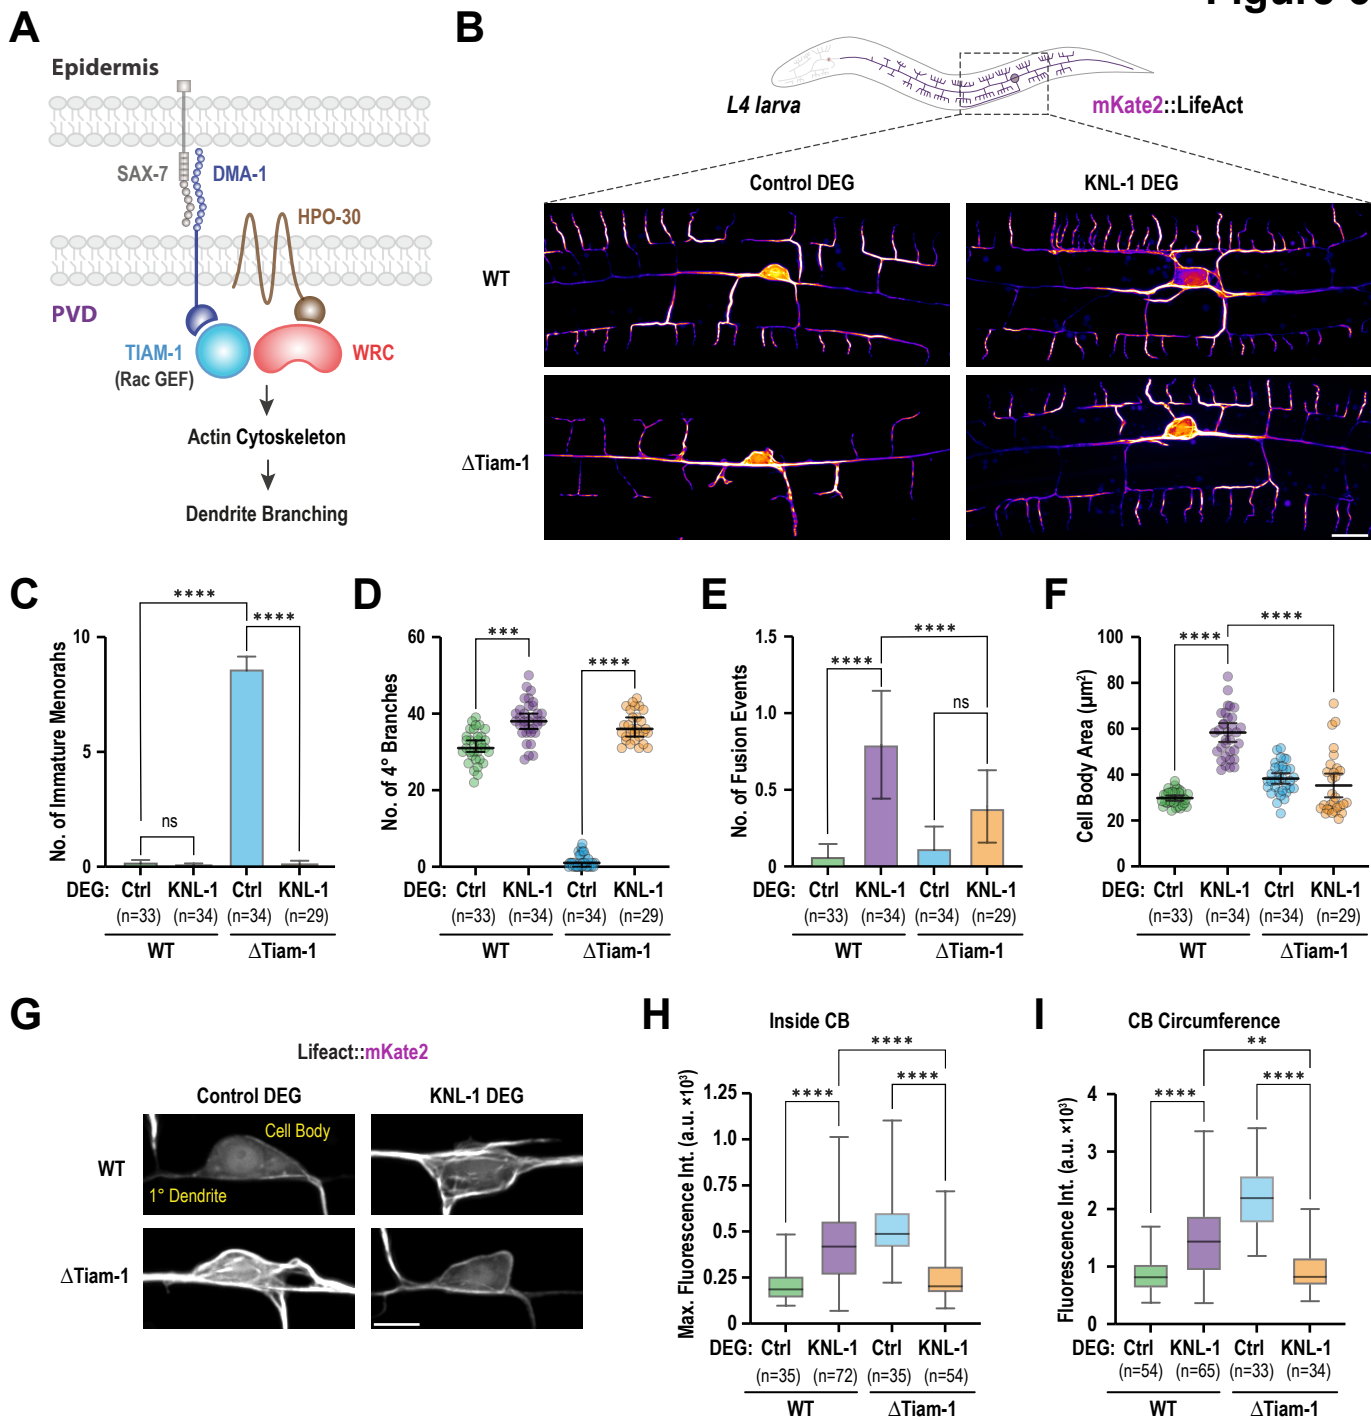



**Figure 6. Degradation of KNL-1 rescues the dendrite branching defects in TIAM-1/RacGEF deletion animals.**

410 **(A)** Schematic showing the signaling pathway involved in 3° & 4° dendrite branching.  
411 Interactions between the ligand SAX-7 expressed in epidermis and DMA-1 receptor in PVD  
412 recruits the TIAM-1/RacGEF which then promotes dendrite branching by activating actin  
413 polymerization. **(B)** Images of PVD dendrites expressing mKate2::Lifeact in indicated  
414 conditions. Scale bar, 10µm. **(C-E)** Quantification of PVD menorah organization in the  
415 indicated conditions. Menorahs that lack 4° branches are considered “immature menorahs”.  
416 **(F)** Quantification of the area of the cell body in the indicated conditions. **(G)** Images highlight  
417 actin distribution in the cell body and proximal anterior primary dendrite in indicated  
418 conditions. Scale bar, 5µm. **(H&I)** Quantification of Lifeact fluorescence intensity inside the  
419 cell body (CB) in the indicated conditions.

## Figure S1

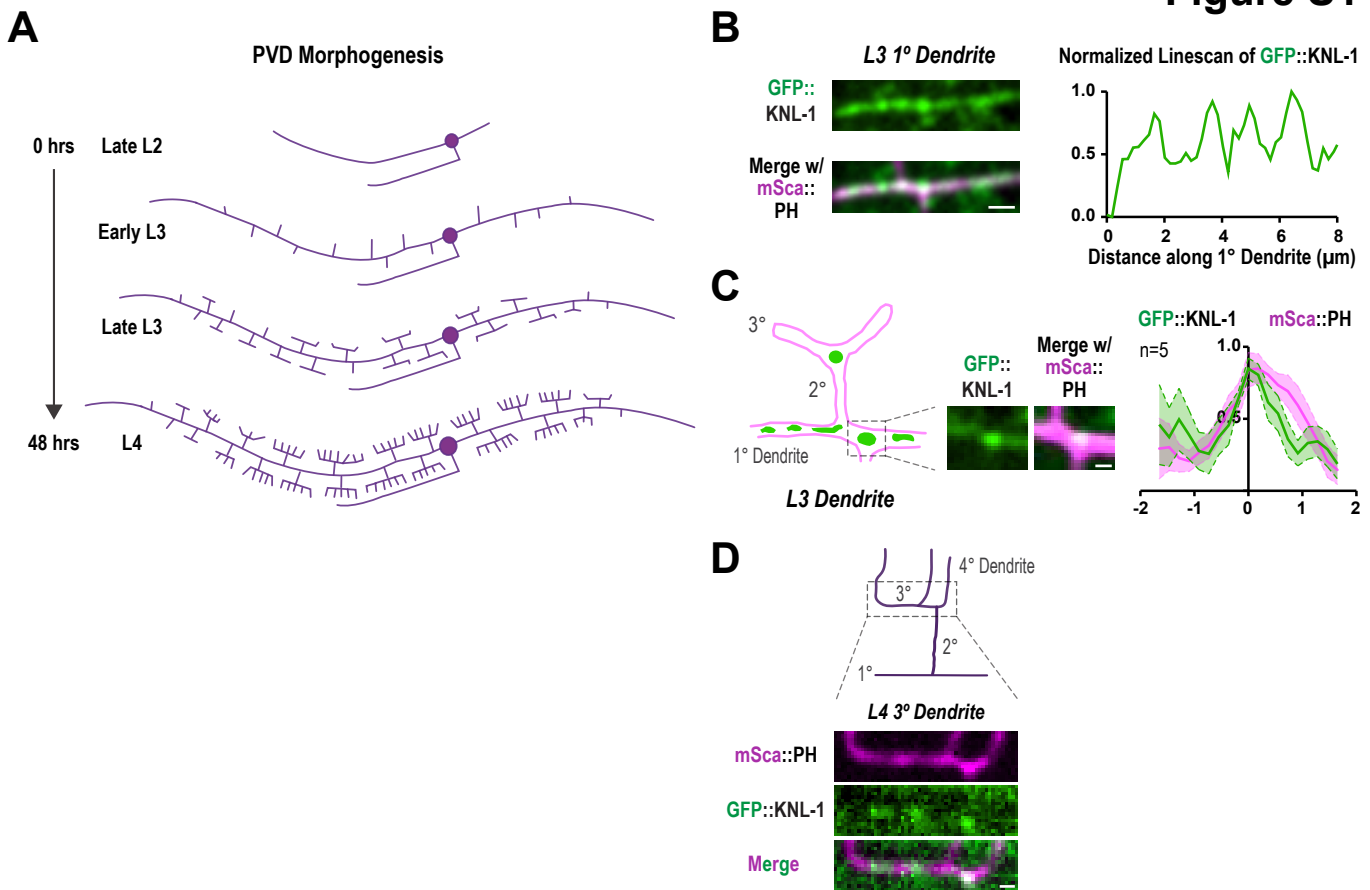

### Figure S1. PVD morphogenesis & KNL-1 localization.

420 **(A)** Schematic of the PVD neuron morphogenesis from L2 stage until the L4 larval stage.  
421 Dendrite outgrowth, branching and menorah formation takes about 48 hours. **(B)** (Left)  
422 Localization of GFP::**KNL-1** within the primary dendrite at the L3 stage. **KNL-1** forms distinct  
423 puncta like structures. Scale bar, 2  $\mu\text{m}$ . (Right) Linescan of the GFP::**KNL-1** intensity. The  
424 peaks correspond to the puncta seen on the image. **(C)** (Left) Schematic and image  
425 showing GFP::**KNL-1** enrichment at the base of branchpoint between 1 $^\circ$  and 2 $^\circ$  dendrite at  
426 the L3 stage. Scale bar, 1  $\mu\text{m}$ . (Right) Plot showing the average of the fluorescent intensity  
427 linescans of GFP::**KNL-1** superimposed with that of mScarlet-I::**PH**. Branchpoints show an  
428 increased intensity of **PH** and **KNL-1** signal. **(D)** Image shows distribution of GFP::**KNL-1**  
429 within the 3 $^\circ$  dendrite at the early L4 stage. Scale bar, 2  $\mu\text{m}$ .

## Figure S2

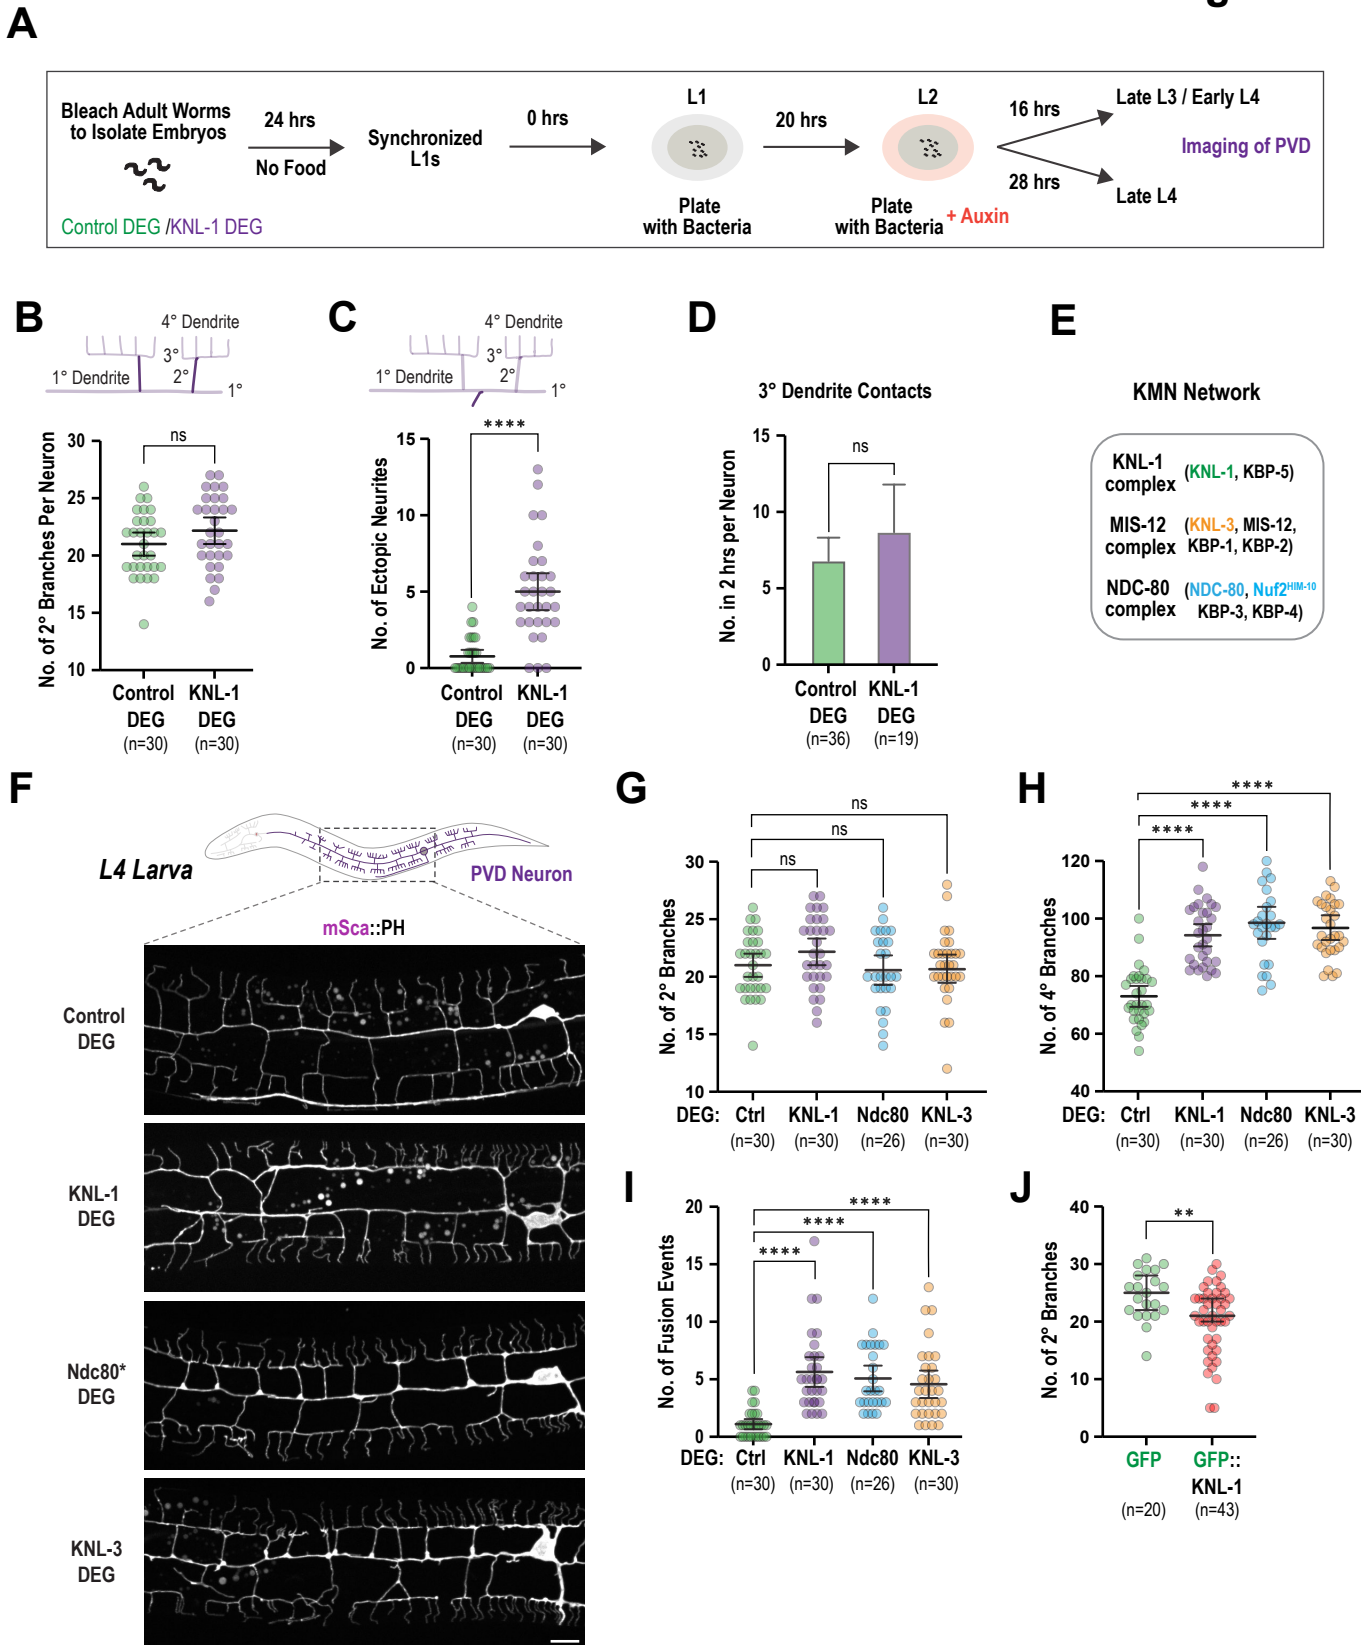

**Figure S2. Effects of degradation of KMN network on PVD morphology.**

430 **(A)** Schematic indicates the experimental design for degrading AID::KNL-1. To obtain  
431 synchronized L1 animals, embryos from control or AID::KNL-1 adult worms expressing PVD-  
432 specific TIR1 transgene were isolated by bleach treatment and hatched for 24 hours on plates  
433 without food. L1 larvae were placed on a plate with food until they reached the L2 stage  
434 (20hrs). The L2 stage animals were transferred to plates with bacteria and auxin and grown  
435 until they reached L4 stage (24hrs). The late L4 stage animals have fully developed menorahs  
436 and were imaged to analyze the PVD morphology. **(B&C)** Quantification of the numbers of 2°  
437 branches and the number of ectopic branches in control & KNL-1 DEG. **(D)** Quantification of  
438 the filopodial protrusions from the anterior primary dendrite during two-hour time lapses. **(E)**  
439 Schematic of the components of the KNL1/Mis12/Ndc80 complex. **(F)** Images of PVD  
440 dendrite organization in control, KNL-1 DEG, Ndc80 DEG & KNL-3 DEG.\* In the Ndc80 DEG,  
441 AID was fused to both NDC-80 & NUF2<sup>Him1-10</sup> subunits. Scale bar, 10 μm. **(G-I)** Quantification  
442 of PVD dendrite organization including the number of 2° & 4° branches and fusions between  
443 menorahs in the indicated conditions. **(J)** Quantification of the number of 2° branches in the  
444 dendrites of PVD in control and KNL-1::GFP overexpressing animals.

## Figure S3

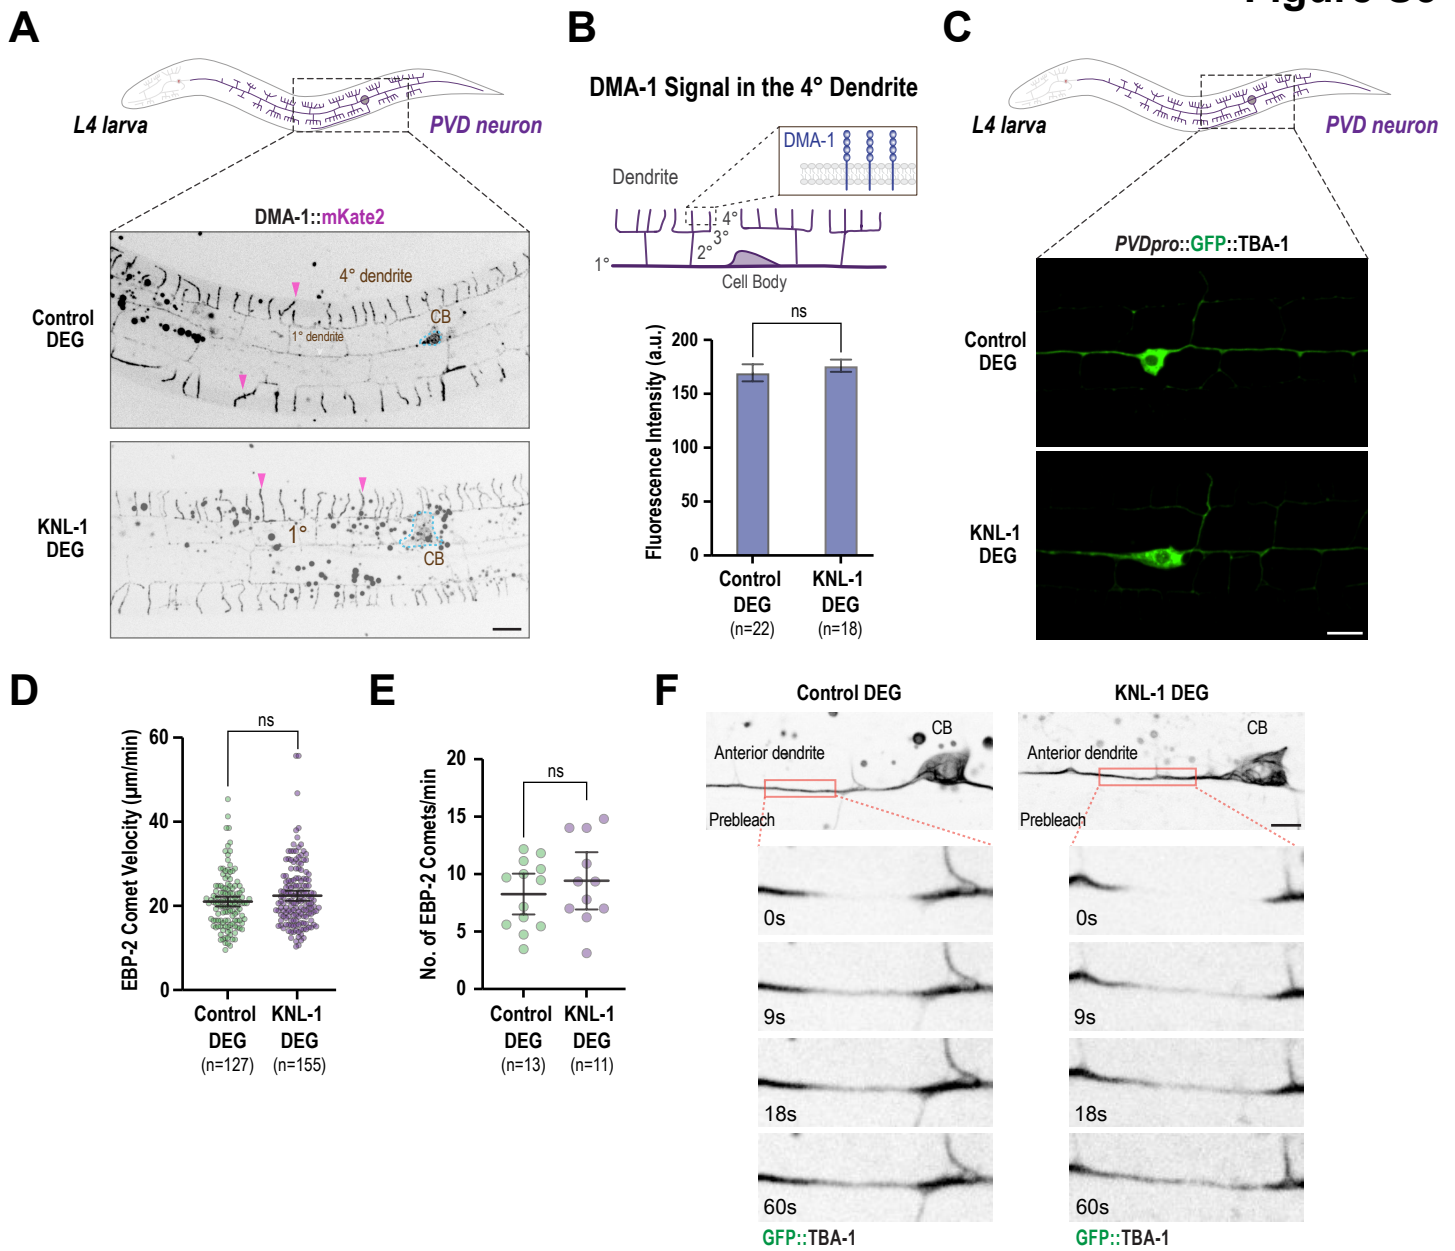

**Figure S3. DMA-1 distribution & microtubule organization & stability after degradation of KNL-1 in the PVD.**

445 **(A)** Localization of the dendrite guidance receptor, DMA-1 in control & KNL-1 DEG at the L4  
446 stage. Pink arrow heads show enrichment of DMA-1 in the 4° dendrite. Scale bar, 10µm.  
447 DMA-1 is restricted to dendrite structures and no axonal signal for DMA-1 is visible **(B)**  
448 Quantification of DMA-1 fluorescent signal in the PVD dendrites shows that both the control  
449 and KNL-1 has similar levels of DMA-1. **(C)** Images of Pdes-2 driven GFP::TBA-1 in the  
450 control & KNL-1 degrader animals. Tubulin distribution looks similar in both conditions.  
451 GFP::TBA-1 is detected predominantly in the 1° dendrite and is largely absent from the  
452 dendrite branches. Scale bar, 10 µm. **(D&E)** Quantification of EB1<sup>EBP-2</sup>::GFP comet dynamics  
453 in control & KNL-1 DEG. **(F)** (Top) Still images of the PVD anterior primary dendrite  
454 expressing endogenous GFP::TBA-1 in control & KNL-1 DEG animals. Scale bar, 5 µm. The  
455 dashed rectangles indicate the Region of Interest (ROI) that were bleached in the FRAP  
456 experiments. (Bottom) Prebleach and postbleach images of GFP::TBA-1 in control & KNL-1  
457 DEG animals.

## Figure S4

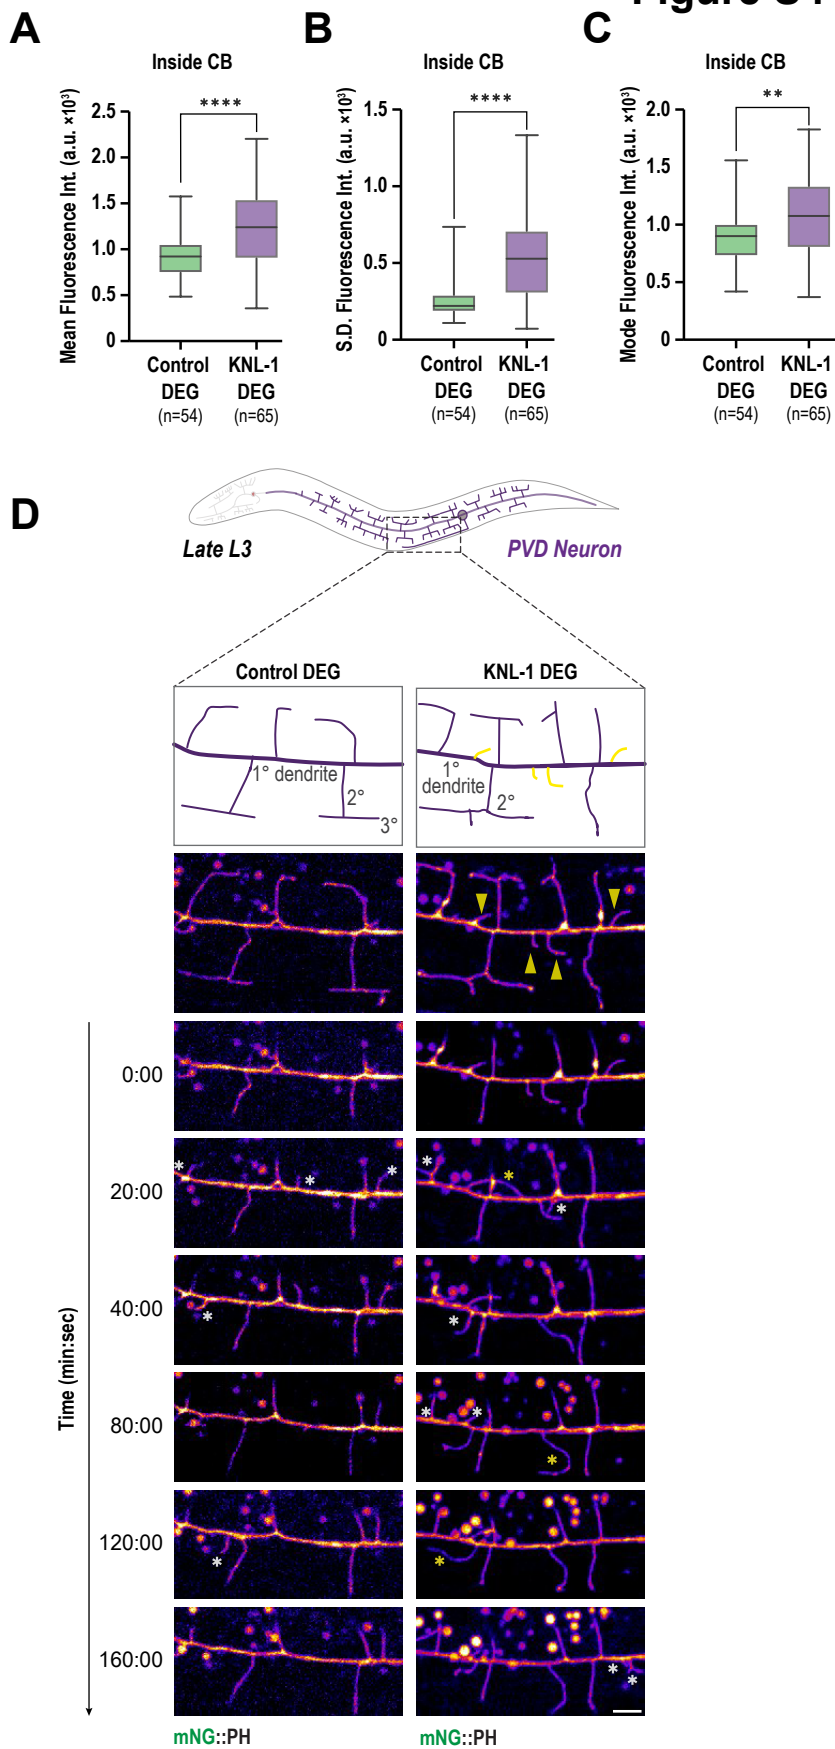



**Figure S4. Analysis of F-actin distribution of in the control and KNL-1 degraded animals; filopodia dynamics in L3 animals.**

458 **(A-C)** Quantification of Lifeact fluorescence intensity inside the cell body. **(D)** Snapshots of  
459 time lapse imaging of 1° dendrite branch dynamics in control & KNL-1 DEG animals at the  
460 late L3 stage. Yellow arrowheads indicate filopodia. White asterisks indicate newly formed  
461 filopodia. Yellow asterisks indicate the misguided filopodia that runs parallel to the 1° dendrite.  
462 Scale bar, 5  $\mu$ m

## Figure S5

**A**

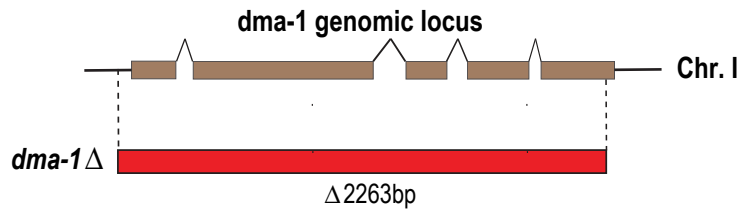

**B**

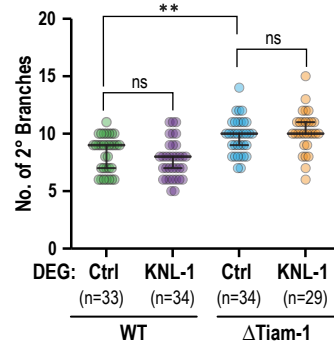

**Figure S5. Analysis of KNL-1 degradation in dma-1 and tiam-1 deletion background.**

463 **(A)** Schematic of the dma-1 gene deletion. Dashed line point to the location of the crRNAs  
464 that were used to generate the gene deletion. **(B)** Quantification of PVD 2° branches in the  
465 indicated conditions. tiam-1 $\Delta$  shows a slight increase in the number of 2° branches. As the  
466 counts are from a single timepoint it is not clear whether these are stable 2° branches or long  
467 unstable filopodia.

## MATERIALS AND METHODS

### C. elegans Strains & Methods

468 All *C. elegans* strains were maintained at 20°C on standard Nematode Growth Media  
469 (NGM) plates seeded with OP50 bacteria. The genotypes of the *C. elegans* strains used in  
470 this study are described in *Table S1*.

471 Single copy transgenic integrations were engineered using the transposon based *mos1*  
472 mediated Single Copy Insertion (*mosSCI*) method<sup>40</sup>. Briefly, the strains were generated by  
473 injecting a mixture of repair plasmid containing the transgene and a positive selection marker,  
474 transposase plasmid, and the three plasmids encoding fluorescent markers for negative  
475 selection [pCFJ90 (*Pmyo-2::mCherry*), pCFJ104 (*Pmyo-3::mCherry*) and pGH8 (*Prab-*  
476 *3::mCherry*)] into appropriate *C. elegans* strains that contain *mos1* insertion sites at specific  
477 genomic locations within Chr I, II, IV or V. Positive integrants were identified by selecting  
478 worms that were moving and did not contain fluorescent selection markers. Integration of  
479 transgenes were confirmed by PCR, spanning both homology arms. Endogenous tagging of  
480 various genes (see *Table S1*) at the N- or C-terminus and generation of the *dma-1* deletion  
481 were done using CRISPR/Cas9 methods<sup>41–43</sup>. The specific method and guide RNAs used to  
482 generate each strain are described in *Table S2*. Briefly, a DNA mix (Dickinson et al., 2015;  
483 Waaijers et al., 2013) or Cas9RNP mix (Paix et al., 2015), containing the respective repair  
484 template, guide RNA sequences, Cas9 and selection markers were injected into N2 animals.  
485 Recombinant strains were identified by appropriate selection method and were confirmed by  
486 PCR, spanning both homology regions. All plasmids used for the strain constructions were  
487 constructed using the Gibson Assembly method<sup>44</sup>.

### Auxin Degradation

488 Worms were synchronized at L1 arrest stage by bleaching gravid adults in NGM plate  
489 using a 1M sodium hydroxide and 2.5% sodium hypochlorite (Acros Organics) solution to  
490 obtain eggs. The eggs were then left to hatch for 48 hours at 20°C allow hatched L1 larvae  
491 to enter L1 arrest stage. Subsequently, the worms were washed with M9 buffer and  
492 transferred into a centrifuge tube for pelleting for 1 min at 1000 RPM. The pelleted  
493 synchronized L1s were transferred to OP-50 seeded NGM plates and maintained at 20°C  
494 (T=0hr). Auxin treatment was performed by transferring worms to OP-50 seeded NGM plates  
495 containing 4 mM auxin (K-NAA, N160, Phytochrome laboratories) at T=20hr post  
496 synchronization. The auxin containing NGM plates were seeded with 200µl of high-density  
497 OP-50 and left to dry for 2 days at room temperature. The seeded plates were stored for up  
498 to 1 month at 4°C.

### Fluorescence microscopy and image analysis

499 To image PVD neurons expressing the appropriate markers L2 or L4 stage worms  
500 were anaesthetized in 5 mM Levamisole and mounted in M9 on a 2% agarose pad. Images  
501 were acquired using a spinning disc confocal imaging system with a Yokogawa spinning disk  
502 unit (CSU-W1), a Nikon Ti2-E fully motorized inverted microscope, with a CFI60 Plan  
503 Apochromat lambda 60X Oil (Nikon) objective and a Photometrics Prime 95B camera. For  
504 imaging Lifeact::mKate2 marker a CFI60 Plan Apochromat lambda 100X Oil (Nikon) objective  
505 was used. Z-stacks of 0.5 µm or 1.0 µm were acquired to cover the PVD closer to the side  
506 facing the coverslip / objective.

507 To quantify KNL-1 degradation the Z-stacks were projected into a maximum intensity  
508 projection. The mean intensity of KNL-1::GFP at the cell body was measured using a polygon  
509 selection drawn over the cell body boundary using Image J (Fiji).

510 To quantify co-localization of mSca::PH with KNL1::GFP separate line scans were  
511 acquire using a segmented line (width=1 pixels) at a maximum of 2  $\mu\text{m}$  of either side of the  
512 branchpoint/base of the branch using Image J (Fiji). The values were normalized to the  
513 maximum and minimum intensity value.

514 To quantify the morphology of the PVD dendrites the Z-stacks were projected into a  
515 maximum intensity projection. The various dendrite morphology parameters were measured  
516 separately for the posterior dendrite and the anterior proximal dendrite (100 $\mu\text{m}$  & 50  $\mu\text{m}$  from  
517 the soma for worms expressing the PH marker & Lifeact marker, respectively). The 2<sup>o</sup>  
518 dendrites were identified as orthogonal branches to 1<sup>o</sup>dendrite containing higher order  
519 branches (3<sup>o</sup> and/or 4<sup>o</sup> branches). The 4<sup>o</sup> dendrites were identified as orthogonal branches to  
520 the 3<sup>o</sup>dendrites. Fusion was identified as two adjacent 3<sup>o</sup> dendrite lacking a gap (Smith et al.,  
521 2012). Ectopic branches were identified as branches protruding out of the 1<sup>o</sup> dendrite with a  
522 length of at least 2x higher than its width and with no higher order branches. The cell body  
523 area was measured using a polygon selection drawn over the cell body boundary using Image  
524 J (Fiji).

525 To quantify the morphology of the PVD dendrites for the extrachromosomal arrays the  
526 fluorescence intensity of GFP or KNL-1::GFP were measured in the cell body using the  
527 polygon selection drawn over the cell body boundary using Image J (Fiji). The values were  
528 normalised to the background fluorescence intensity to ensure only worms with over-  
529 expression were included in the analysis. Hence, if the intensity was greater than half the

530 max recorded intensity then the worms were included in the analysis. The morphology was  
531 quantified for the whole neuron using the parameters previously described.

532 To quantify RAB-3 signal the Z-stacks were projected into a maximum intensity  
533 projection and the fluorescence intensity was measured along the length of the axon of each  
534 neuron and along an equivalent length in the proximal anterior dendrite using a segmented  
535 line (width=3 pixels) in Image J (Fiji). To quantify DMA-1 signal the Z-stacks were projected  
536 into a maximum intensity projection and the fluorescence intensity was measured in the 4°  
537 dendrites adjacent to the cell body using a segmented line (width=3 pixels) in Image J (Fiji).

538 To quantify actin distribution at the cell body the Z-stacks were projected into a  
539 maximum intensity projection of the z-planes that included one single PVD neuron (~18 x 1  
540 µm z-stacks). Mean intensity of actin around the cell body was measured using a segmented  
541 line (width=3 pixels) drawn over the cell body boundary with the anterior side as the start  
542 point and following a clockwise direction using Image J (Fiji). The standard deviation,  
543 maximum and minimum intensity of actin at the cell body were measured using a polygon  
544 selection drawn over the cell body boundary using Image J (Fiji).

545 To quantify membrane blebbing in L4 worms the Z-stacks were projected into a  
546 maximum intensity projection and membrane blebbing was quantified for the whole anterior  
547 dendrite.

548 To quantify LGG-1 puncta in day 3 adults, the Z-stacks were projected into a  
549 maximum intensity projection and a 50 µm x 50 µm section centred around the cell body  
550 was analysed for each worm. LGG-1 puncta were counted if they were not in the cell body  
551 or axon initial segment.

## Timelapse Imaging

552 For time-lapse imaging of dendrite dynamics, synchronized worms were anesthetized  
553 in 5 mM Levamisole after auxin treatment at 8 hours post synchronization or in the absence  
554 of treatment. 9-11 x 0.9  $\mu\text{m}$  z-stacks were acquired at 1 frame per 1:20 minutes for 2 hours  
555 and an exposure of 50 ms. Acquisition was performed using using a spinning disc confocal  
556 imaging system with a Yokogawa spinning disk unit (CSU-W1), a Nikon Ti2-E fully motorized  
557 inverted microscope, with a CFI60 Plan Apochromat lambda 60X Oil (Nikon) objective and  
558 Photometrics Prime 95B camera.

559 For quantifications, time of contact of 3<sup>o</sup> dendrites, number of contacts and number of  
560 unresolved of contacts were measured from maximum intensity projections of z-stacks using  
561 Image J (Fiji). This quantification was performed for the first 100  $\mu\text{m}$  anterior to the soma.  
562 Contacts of 3<sup>o</sup> dendrites were identified as two adjacent 3<sup>o</sup> dendrite lacking a gap (Smith et  
563 al., 2012). Only the contacts that occurred during the timelapse acquisition were quantified.  
564 Unresolved contacts were identified as contacts that lacked a gap by the end of the  
565 timelapses. Protrusions were identified as any membrane protrusions smaller than 2.5  $\mu\text{m}$ .

566 For timelapse imaging of EBP-2 dynamics synchronized worms were anesthetized in  
567 5 mM Levamisole after auxin treatment. A single z-slice was acquired of the first 50  $\mu\text{m}$  of the  
568 anterior dendrite at 1 frame per 1 sec using a spinning disc confocal imaging system with a  
569 Yokogawa spinning disk unit (CSU-W1), a Nikon Ti2-E fully motorized inverted microscope,  
570 with a CFI60 Plan Apochromat lambda 100X Oil (Nikon) objective and an Photometrics Prime  
571 95B camera. For the generation of kymographs Fiji plugin, KymographClear 2.0a<sup>45</sup> was  
572 used. A line of width 2 pixel was drawn to generate kymograph. The number of  
573 lines (indicative of the number of comets) in each direction was measured and the length and  
574 height of each line was used to calculate the velocities of each individual comet.



### Fluorescence Recovery After Photobleaching (FRAP) of Actin and Microtubule

575 For FRAP imaging of microtubule marker worms were anesthetized in 5 mM  
576 Levamisole. A single z-slice was acquired of the first 50  $\mu\text{m}$  of the anterior dendrite at 1 frame  
577 per 1 sec. After 3 prebleach frames, 1.5  $\mu\text{m}$  region 20  $\mu\text{m}$  away from the cell body was  
578 bleached using 405 nm laser at 30% power, 150  $\mu\text{s}$  dwell time and 5 laser iterations. Images  
579 were acquired for 2 minutes post bleaching. For FRAP imaging of actin marker worms were  
580 anesthetized in 5  $\mu\text{l}$  5mM Levamisole in M9. A single z-slice was acquired of the first 50  $\mu\text{m}$   
581 of the anterior dendrite at 1 frame per 1 sec and an exposure of 150 ms. After 3 prebleach  
582 frames, 1.5  $\mu\text{m}$  region 20  $\mu\text{m}$  away from the cell body was bleached using 405 nm laser at  
583 40% power, 300  $\mu\text{s}$ . Dwell time and 5 laser iterations. Images were acquired for 2 minutes  
584 post bleaching.

585 To quantify fluorescence intensity a region of interest (ROI) of 1.5  $\mu\text{m}$  was defined  
586 using elliptical selection in Image J (Fiji). The fluorescence intensity was normalized to the  
587 background and corrected for the fluorescence intensity of non-bleached area. Additionally,  
588 the FRAP actin marker analysis required the values to be additionally subtracted by the  
589 intensity at the photobleached region 1 frame post photobleaching.

### Behavioural assays

590 For the locomotion assays L4 worms were transferred to a freshly seeded NGM plate  
591 for 1 hour at 20°C after auxin treatment. Acquisition was performed using Nikon SMZ18  
592 microscope at 2X P2-SHR Plan Apo 1X objective and Photometrics Cool SNAP camera. 5  
593 tracks were measured per worm and 15 worms were measured per strain. The wavelength  
594 was measured as the distance between two successive peaks and the amplitude as half the

595 measurement of the height between two opposing peaks. Five measurements were taken per  
596 track.

### **Quantification and Statistical Analysis**

597 Details of the methods employed to extract and quantify various parameters in microscopy  
598 datasets are described in the image analysis section. The statistical tests used to determine  
599 significance are described in the figure legends. The data normality was assessed using a  
600 Shapiro-Wilk test. For normally distributed data either an unpaired t-test (for comparisons  
601 between two groups) or an ordinary one-way ANOVA with a follow up Holm-Sidak multiple  
602 comparison test (for comparisons between three and more groups) were performed. For  
603 data sets that did not pass the normality test either a Mann-Whitney test (for comparisons  
604 between two groups) or a Kruskal-Wallis test with a follow up Dunn's multiple comparison  
605 test (for comparisons between three and more groups) were performed. All comparisons  
606 were done in GraphPad Prism (GraphPad Software) and the stars \*\*\*\*, \*\*\*, \*\* and ns  
607 correspond  $p < 0.0001$ ,  $p < 0.001$ ,  $p < 0.01$  and "not significant", respectively.

**Table S1. C. elegans Strains**

| STRAIN DESCRIPTION                                                                                                                                                                                                                                                                                                                                                                                        | SOURCE     | IDENTIFIER |
|-----------------------------------------------------------------------------------------------------------------------------------------------------------------------------------------------------------------------------------------------------------------------------------------------------------------------------------------------------------------------------------------------------------|------------|------------|
| <i>dhaSI145</i> [oxTi185; pDC973; Pdes-2--TIR1--F2A--mTagBFP--AID*--NLS--tbb-23'UTR; cb-unc-119(+)] #1; <i>dhaSi89</i> [pDC747; Punc-86::TIR-1::unc543'UTR; cb-unc-119(+)] #1; ; <i>unc-119(ed3)III?</i> ; <i>dhaSi76</i> [oxTi177;PDC731; Pdes-2::mSca-PH::unc-54 3'UTR; cb-unc-119(+)] IV                                                                                                               | This study | DKC815     |
| <i>dhaSI145</i> [oxTi185; pDC973; Pdes-2--TIR1--F2A--mTagBFP--AID*--NLS--tbb-23'UTR; cb-unc-119(+)] #1; <i>dhaSi89</i> [pDC747; Punc-86::TIR-1::unc543'UTR; cb-unc-119(+)] #1; <i>knl-1(dha122 (AID::dTagmB&gt;F&gt;P:::KNL-1) )III</i> ; <i>unc-119(ed3)III?</i> ; <i>dhaSi76</i> [oxTi177;PDC731; Pdes-2::mSca-PH::unc-54 3'UTR; cb-unc-119(+)] IV                                                      | This study | DKC849     |
| <i>dhaSI145</i> [oxTi185; pDC973; Pdes-2--TIR1--F2A--mTagBFP--AID*--NLS--tbb-23'UTR; cb-unc-119(+)] #1; <i>dhaSi89</i> [pDC747; Punc-86::TIR-1::unc543'UTR; cb-unc-119(+)] #1; ; <i>dhaSi76</i> [ndc-80( <i>dha148</i> ; NDC-80::AID::dgfp^3XFLAG) ; oxTi177;PDC731; Pdes-2::mSca-PH::unc-54 3'UTR; cb-unc-119(+)] IV<br><i>dhaSi76</i> [oxTi177;PDC731; Pdes-2::mSca-PH::unc-54 3'UTR; cb-unc-119(+)] IV | This study | DKC860     |
| <i>dhaSI145</i> [oxTi185; pDC973; Pdes-2--TIR1--F2A--mTagBFP--AID*--NLS--tbb-23'UTR; cb-unc-119(+)] #1; <i>dhaSi89</i> [pDC747; Punc-86::TIR-1::unc543'UTR; cb-unc-119(+)] #1; <i>unc-119(ed3)III?</i> ; <i>dhaSi76</i> [oxTi177;PDC731; Pdes-2::mSca-PH::unc-54 3'UTR; cb-unc-119(+)] IV; <i>KNL-3(du2 [AID::KNL-3]) V</i>                                                                               | This study | DKC911     |
| <i>dhaEx1</i> [Pdes-2::Knl-1::GFP::unc 54 3'UTR]; <i>dhaSi76</i> [oxTi177;PDC731; Pdes-2::mSca-PH::unc-54 3'UTR; cb-unc-119(+)] IV                                                                                                                                                                                                                                                                        | This study | DKC822     |
| <i>dhaEx3</i> [Pdes-2::GFP::unc 54 3'UTR]; <i>dhaSi76</i> [oxTi177;PDC731; Pdes-2::mSca-PH::unc-54 3'UTR; cb-unc-119(+)] IV                                                                                                                                                                                                                                                                               | This study | DKC824     |
| <i>dhaSI145</i> [oxTi185; pDC973; Pdes-2--TIR1--F2A--mTagBFP--AID*--NLS--tbb-23'UTR; cb-unc-119(+)] #1; <i>dhaSi89</i> [pDC747; Punc-86::TIR-1::unc543'UTR; cb-unc-119(+)] #1; <i>knl-1(dha122 (AID::dTagmB&gt;F&gt;P:::KNL-1) )III</i> ; <i>unc-119(ed3)III?</i> ; <i>hrtSi17</i> [Pdes-2::mKate2::rab-3 LG]IV                                                                                           | This study | DKC1002    |
| <i>dhaSI145</i> [oxTi185; pDC973; Pdes-2--TIR1--F2A--mTagBFP--AID*--NLS--tbb-23'UTR; cb-unc-119(+)] #1; <i>dhaSi89</i> [pDC747; Punc-86::TIR-1::unc543'UTR; cb-unc-119(+)] #1; <i>unc-119(ed3)III?</i> ; <i>hrtSi17</i> [Pdes-2::mKate2::rab-3 LG]IV                                                                                                                                                      | This study | DKC1001    |
| <i>dhaSI145</i> [oxTi185; pDC973; Pdes-2--TIR1--F2A--mTagBFP--AID*--NLS--tbb-23'UTR; cb-unc-119(+)] #1; <i>dhaSi89</i> [pDC747; Punc-86::TIR-1::unc543'UTR; cb-unc-119(+)] #1; <i>dhaSi272</i> [oxTi177; pDC1122 ;Pser2-prom-3::DMA-1::mKate2::unc 54 3'UTR ; cb-unc-119(+)]V                                                                                                                             | This study | DKC1076    |
| <i>dhaSI145</i> [oxTi185; pDC973; Pdes-2--TIR1--F2A--mTagBFP--AID*--NLS--tbb-23'UTR; cb-unc-119(+)] #1; <i>dhaSi89</i> [pDC747; Punc-86::TIR-1::unc543'UTR; cb-unc-119(+)] #1; <i>knl-1(dha122 (AID::dTagmB&gt;F&gt;P:::KNL-1) )III</i> ; <i>unc-119(ed3)III?</i> ; <i>dhaSi272</i> [oxTi177; pDC1122 ;Pser2-prom-3::DMA-1::mKate2::unc 54 3'UTR ; cb-unc-119(+)]V                                        | This study | DKC1075    |
| <i>dhaSI145</i> [oxTi185; pDC973; Pdes-2--TIR1--F2A--mTagBFP--AID*--NLS--tbb-23'UTR; cb-unc-119(+)] #1; <i>dhaSi89</i> [pDC747; Punc-86::TIR-1::unc543'UTR; cb-unc-119(+)] #1; <i>dhaSi241</i> [oxTi177;PDC978; Pdes-2::GFP::tba-1::unc-54-3'UTR; cb-unc-119(+)] V #1                                                                                                                                     | This study | DKC917     |

|                                                                                                                                                                                                                                                                                                                                                                                                                                                   |            |         |
|---------------------------------------------------------------------------------------------------------------------------------------------------------------------------------------------------------------------------------------------------------------------------------------------------------------------------------------------------------------------------------------------------------------------------------------------------|------------|---------|
| <i>dhaSI145</i> [oxTi185; pDC973; Pdes-2--TIR1--F2A--mTagBFP--AID*--NLS--tbb-23'UTR; cb-unc-119(+)] #1; <i>dhaSi89</i> [pDC747; Punc-86::TIR-1::unc543'UTR; cb-unc-119(+)] #1; <i>knl-1</i> ( <i>dha122</i> (AID::dTagmB>F>P:::KNL-1) ) III ; <i>unc-119</i> (ed3) III?; <i>dhaSi76</i> [oxTi177;PDC731; Pdes-2::mSca-PH::unc-54 3'UTR; cb-unc-119(+)] IV; <i>dhaSi241</i> [oxTi177;PDC978; Pdes-2::GFP::tba-1::unc-54-3'UTR; cb-unc-119(+)] V #1 | This study | DKC916  |
| <i>dhaSI145</i> [oxTi185; pDC973; Pdes-2--TIR1--F2A--mTagBFP--AID*--NLS--tbb-23'UTR; cb-unc-119(+)] #1; <i>dhaSi89</i> [pDC747; Punc-86::TIR-1::unc543'UTR; cb-unc-119(+)] #1; <i>knl-1</i> ( <i>dha122</i> (AID::dTagmB>F>P:::KNL-1) ) III; <i>dhaSi45</i> [oxTi365; pDC675; Pdes-2::mNG-PH::unc-54 3'UTR; cb-unc-119(+)] V clone A                                                                                                              | This study | DKC1089 |
| <i>dhaSi89</i> [pDC747; Punc-86::TIR-1::unc543'UTR; cb-unc-119(+)] #1; <i>knl-1</i> ( <i>dha130</i> ; HA::7XGFP11::knl-1) III; <i>dhaSi76</i> [oxTi177;PDC731; Pdes-2::mSca-PH::unc-54 3'UTR; cb-unc-119(+)] IV ;outcrossed 3X ; <i>dhaSi207</i> [pDC1020;unc-86pro::splitGFP1-10::tbb-2 3'UTR; cb-unc-119(+)] V #2                                                                                                                               | This study | DKC1139 |
| <i>dhaSi89</i> [pDC747; Punc-86::TIR-1::unc543'UTR; cb-unc-119(+)] #1; <i>knl-1</i> ( <i>dha185</i> ; HA::7XGFP11::knl-1::AID) III; <i>dhaSi76</i> [oxTi177;PDC731; Pdes-2::mSca-PH::unc-54 3'UTR; cb-unc-119(+)] IV ;outcrossed 3X ; <i>dhaSi207</i> [pDC1020;unc-86pro::splitGFP1-10::tbb-2 3'UTR; cb-unc-119(+)] V                                                                                                                             | This study | DKC1151 |
| <i>dhaSi207</i> [pDC1020;unc-86pro::splitGFP1-10::tbb-2 3'UTR; cb-unc-119(+)] II #2; <i>knl-1</i> ( <i>dha130</i> ; HA::7XGFP11::knl-1) III <i>unc-119</i> (ed3) III; <i>dhaSi76</i> [oxTi177;PDC731; Pdes-2::mSca-PH::unc-54 3'UTR; cb-unc-119(+)] IV ;outcrossed 3X                                                                                                                                                                             | This study | DKC870  |
| <i>dhaSi249</i> [oxTi177; pDC732 Punc-86::mSca-PH::unc-54 3'UTR] V #1; <i>dhaSi207</i> [pDC1020;unc-86pro::splitGFP1-10::tbb-2 3'UTR; cb-unc-119(+)] II #2; <i>knl-1</i> ( <i>dha130</i> ; HA::7XGFP11::knl-1) III                                                                                                                                                                                                                                | This study | DKC872  |
| <i>dhaSI145</i> [oxTi185; pDC973; Pdes-2--TIR1--F2A--mTagBFP--AID*--NLS--tbb-23'UTR; cb-unc-119(+)] #1; <i>dhaSi89</i> [pDC747; Punc-86::TIR-1::unc543'UTR; cb-unc-119(+)] #1; <i>dhaSi243</i> [pDC929; oxTi365; Pdes-2--LifeAct-mKate2--tbb-2 3UTR; cb-unc-119(+)] IV #1                                                                                                                                                                         | This study | DKC1035 |
| <i>dhaSI145</i> [oxTi185; pDC973; Pdes-2--TIR1--F2A--mTagBFP--AID*--NLS--tbb-23'UTR; cb-unc-119(+)] #1; <i>dhaSi89</i> [pDC747; Punc-86::TIR-1::unc543'UTR; cb-unc-119(+)] #1; <i>knl-1</i> ( <i>dha122</i> (AID::dTagmB>F>P:::KNL-1) ) III ; <i>unc-119</i> (ed3) III?; <i>dhaSi243</i> [pDC929; oxTi365; Pdes-2--LifeAct-mKate2--tbb-2 3UTR; cb-unc-119(+)] IV #1                                                                               | This study | DKC1057 |
| <i>dhaSI145</i> [oxTi185; pDC973; Pdes-2--TIR1--F2A--mTagBFP--AID*--NLS--tbb-23'UTR; cb-unc-119(+)] #1; <i>dhaSi89</i> [pDC747; Punc-86::TIR-1::unc543'UTR; cb-unc-119(+)] #1; <i>dhaSi243</i> [pDC929; oxTi365; Pdes-2--LifeAct-mKate2--tbb-2 3UTR; cb-unc-119(+)] IV #1; <i>dhaSi45</i> [oxTi365; pDC675; Pdes-2::mNG-PH::unc-54 3'UTR; cb-unc-119(+)] V clone A                                                                                | This study | DKC1087 |
| <i>dhaSI145</i> [oxTi185; pDC973; Pdes-2--TIR1--F2A--mTagBFP--AID*--NLS--tbb-23'UTR; cb-unc-119(+)] #1; <i>dhaSi89</i> [pDC747; Punc-86::TIR-1::unc543'UTR; cb-unc-119(+)] #1; <i>knl-1</i> ( <i>dha122</i> (AID::dTagmB>F>P:::KNL-1) ) III ; <i>unc-119</i> (ed3) III?; <i>dhaSi243</i> [pDC929; oxTi365; Pdes-2--LifeAct-mKate2--tbb-2 3UTR; cb-unc-119(+)] IV #15; pDC675; Pdes-2::mNG-PH::unc-54 3'UTR; cb-unc-119(+)] V clone A              | This study | DKC1113 |
| <i>dhaSI145</i> [oxTi185; pDC973; Pdes-2--TIR1--F2A--mTagBFP--AID*--NLS--tbb-23'UTR; cb-unc-119(+)] #1; <i>tiam-1</i> (ok772) I; <i>dhaSi89</i> [pDC747; Punc-86::TIR-1::unc543'UTR; cb-unc-119(+)] #1; <i>knl-1</i> ( <i>dha122</i> (AID::dTagmB>F>P:::KNL-1) ) III ; <i>unc-119</i> (ed3) III?; <i>dhaSi243</i> [pDC929; oxTi365; Pdes-2--LifeAct-mKate2--tbb-2 3UTR; cb-unc-119(+)] IV #1                                                      | This study | DKC1103 |
| <i>tiam-1</i> (ok772) I; <i>dhaSi89</i> [pDC747; Punc-86::TIR-1::unc543'UTR; cb-unc-119(+)] #1; <i>unc-119</i> (ed3) III?; <i>dhaSi243</i> [pDC929; oxTi365; Pdes-2--LifeAct-mKate2--tbb-2 3UTR; cb-unc-119(+)] IV #1                                                                                                                                                                                                                             | This study | DKC1109 |

|                                                                                                                                                                                                                                                                                                                                                                                                                                                                                                                                                                                          |            |         |
|------------------------------------------------------------------------------------------------------------------------------------------------------------------------------------------------------------------------------------------------------------------------------------------------------------------------------------------------------------------------------------------------------------------------------------------------------------------------------------------------------------------------------------------------------------------------------------------|------------|---------|
| <i>dma-1</i> ( <i>dha155</i> ; <i>DEL</i> ); <i>dhaSi89</i> [pDC747; <i>Punc-86::TIR-1::unc543'UTR</i> ; <i>cb-unc-119(+)</i> ] #1; <i>dhaSi243</i> [pDC929; <i>oxTi365</i> ; <i>Pdes-2--LifeAct-mKate2--tbb-2 3'UTR</i> ; <i>cb-unc-119(+)</i> ]IV #1                                                                                                                                                                                                                                                                                                                                   | This study | DKC1145 |
| <i>dma-1</i> ( <i>dha155</i> ; <i>DEL</i> ); <i>dhaSi89</i> [pDC747; <i>Punc-86::TIR-1::unc543'UTR</i> ; <i>cb-unc-119(+)</i> ] #1; <i>knl-1</i> ( <i>dha122</i> ( <i>AID::dTagmB&gt;F&gt;P:::KNL-1</i> )) III; <i>dhaSi243</i> [pDC929; <i>oxTi365</i> ; <i>Pdes-2--LifeAct-mKate2--tbb-2 3'UTR</i> ; <i>cb-unc-119(+)</i> ]IV #1                                                                                                                                                                                                                                                       | This study | DKC1147 |
| <i>dhaSI145</i> [ <i>oxTi185</i> ; pDC973; <i>Pdes-2--TIR1--F2A--mTagBFP--AID*--NLS--tbb-23'UTR</i> ; <i>cb-unc-119(+)</i> ] #1; <i>dha149</i> ( <i>HA::GFP11::tba-1</i> ); <i>dhaSi89</i> [pDC747; <i>Punc-86::TIR-1::unc543'UTR</i> ; <i>cb-unc-119(+)</i> ] #1; <i>unc-119(ed3)</i> III?; <i>dhaSi76</i> [ <i>oxTi177</i> ; pDC731; <i>Pdes-2::mSca-PH::unc-54 3'UTR</i> ; <i>cb-unc-119(+)</i> ] IV; <i>dhaSi207</i> [pDC1020; <i>unc-86pro::splitGFP1-10::tbb-2 3'UTR</i> ; <i>cb-unc-119(+)</i> ] V #2                                                                             | This study | DKC1086 |
| <i>dhaSI145</i> [ <i>oxTi185</i> ; pDC973; <i>Pdes-2--TIR1--F2A--mTagBFP--AID*--NLS--tbb-23'UTR</i> ; <i>cb-unc-119(+)</i> ] #1; <i>dha149</i> ( <i>HA::GFP11::tba-1</i> ); <i>dhaSi89</i> [pDC747; <i>Punc-86::TIR-1::unc543'UTR</i> ; <i>cb-unc-119(+)</i> ] #1; <i>knl-1</i> ( <i>dha122</i> ( <i>AID::dTagmB&gt;F&gt;P:::KNL-1</i> )) III; <i>unc-119(ed3)</i> III?; <i>dhaSi76</i> [ <i>oxTi177</i> ; pDC731; <i>Pdes-2::mSca-PH::unc-54 3'UTR</i> ; <i>cb-unc-119(+)</i> ] IV; <i>dhaSi207</i> [pDC1020; <i>unc-86pro::splitGFP1-10::tbb-2 3'UTR</i> ; <i>cb-unc-119(+)</i> ] V #2 | This study | DKC1090 |
| <i>dhaSI145</i> [ <i>oxTi185</i> ; pDC973; <i>Pdes-2--TIR1--F2A--mTagBFP--AID*--NLS--tbb-23'UTR</i> ; <i>cb-unc-119(+)</i> ] #1; <i>dhaSi89</i> [pDC747; <i>Punc-86::TIR-1::unc543'UTR</i> ; <i>cb-unc-119(+)</i> ] #1; <i>knl-1</i> ( <i>dha122</i> ( <i>AID::dTagmB&gt;F&gt;P:::KNL-1</i> )) III; <i>unc-119(ed3)</i> III?; <i>dhaSi76</i> [ <i>oxTi177</i> ; pDC731; <i>Pdes-2::mSca-PH::unc-54 3'UTR</i> ; <i>cb-unc-119(+)</i> ] IV; <i>dhaSi269</i> [ <i>oxTi177</i> ; pDC1106; <i>Pser-2prom3::ebp-2::gfp::tbb-2 3'UTR</i> ; <i>cb-unc-119(+)</i> ] V #1                          | This study | DKC1072 |
| <i>dhaSI145</i> [ <i>oxTi185</i> ; pDC973; <i>Pdes-2--TIR1--F2A--mTagBFP--AID*--NLS--tbb-23'UTR</i> ; <i>cb-unc-119(+)</i> ] #1; <i>dhaSi89</i> [pDC747; <i>Punc-86::TIR-1::unc543'UTR</i> ; <i>cb-unc-119(+)</i> ] #1; <i>unc-119(ed3)</i> III?; <i>dhaSi76</i> [ <i>oxTi177</i> ; pDC731; <i>Pdes-2::mSca-PH::unc-54 3'UTR</i> ; <i>cb-unc-119(+)</i> ] IV; <i>dhaSi269</i> [ <i>oxTi177</i> ; pDC1106; <i>Pser-2prom3::ebp-2::gfp::tbb-2 3'UTR</i> ; <i>cb-unc-119(+)</i> ] V #1                                                                                                      | This study | DKC1073 |
| <i>dhaSI145</i> [ <i>oxTi185</i> ; pDC973; <i>Pdes-2--TIR1--F2A--mTagBFP--AID*--NLS--tbb-23'UTR</i> ; <i>cb-unc-119(+)</i> ] #1; <i>dhaSi89</i> [pDC747; <i>Punc-86::TIR-1::unc543'UTR</i> ; <i>cb-unc-119(+)</i> ] #1; <i>unc-119(ed3)</i> III?; <i>dhaSi76</i> [ <i>oxTi177</i> ; pDC731; <i>Pdes-2::mSca-PH::unc-54 3'UTR</i> ; <i>cb-unc-119(+)</i> ] IV; <i>dhaSi269</i> [ <i>oxTi177</i> ; pDC1106; <i>Pser-2prom3::ebp-2::gfp::tbb-2 3'UTR</i> ; <i>cb-unc-119(+)</i> ] V #1                                                                                                      | This study | DKC1127 |
| <i>dhaSI145</i> [ <i>oxTi185</i> ; pDC973; <i>Pdes-2--TIR1--F2A--mTagBFP--AID*--NLS--tbb-23'UTR</i> ; <i>cb-unc-119(+)</i> ] #1; <i>dhaSi89</i> [pDC747; <i>Punc-86::TIR-1::unc543'UTR</i> ; <i>cb-unc-119(+)</i> ] #1; <i>unc-119(ed3)</i> III?; <i>dhaSi76</i> [ <i>oxTi177</i> ; pDC731; <i>dhaSi237</i> [ <i>oxTi177</i> ; pDC1061; <i>Pser-2prom3::mscarlet::linker::LGG1:unc 54 3'UTR</i> ; <i>cb-unc-119(+)</i> ] IV #1                                                                                                                                                           | This study | DKC1126 |
| <i>dhaSI145</i> [ <i>oxTi185</i> ; pDC973; <i>Pdes-2--TIR1--F2A--mTagBFP--AID*--NLS--tbb-23'UTR</i> ; <i>cb-unc-119(+)</i> ] #1; <i>dhaSi89</i> [pDC747; <i>Punc-86::TIR-1::unc543'UTR</i> ; <i>cb-unc-119(+)</i> ] #1; <i>knl-1</i> ( <i>dha122</i> ( <i>AID::dTagmB&gt;F&gt;P:::KNL-1</i> )) III; <i>unc-119(ed3)</i> III?; <i>dhaSi76</i> [ <i>oxTi177</i> ; pDC731; <i>dhaSi237</i> [ <i>oxTi177</i> ; pDC1061; <i>Pser-2prom3::mscarlet::linker::LGG1:unc 54 3'UTR</i> ; <i>cb-unc-119(+)</i> ] IV #1                                                                               | This study | DKC1132 |
| <i>dhaSI145</i> [ <i>oxTi185</i> ; pDC973; <i>Pdes-2--TIR1--F2A--mTagBFP--AID*--NLS--tbb-23'UTR</i> ; <i>cb-unc-119(+)</i> ] #1; <i>dhaSi89</i> [pDC747; <i>Punc-86::TIR-1::unc543'UTR</i> ; <i>cb-unc-119(+)</i> ] #1; <i>unc-119(ed3)</i> III?; <i>unc-119(ed3)</i> III; <i>dhaSi53</i> [ <i>oxTi177</i> ; pDC675; <i>Pdes-2::Mng-PH::unc-54 3'UTR</i> ; <i>cb-unc-119(+)</i> ] IV clone B; <i>dhaSi237</i> [ <i>oxTi177</i> ; pDC1061; <i>Pser-2prom3::mscarlet::linker::LGG1:unc 54 3'UTR</i> ; <i>cb-unc-119(+)</i> ] V #1                                                          | This study | DKC1131 |
| <i>dma-1</i> ( <i>dha155</i> ; <i>DEL</i> )                                                                                                                                                                                                                                                                                                                                                                                                                                                                                                                                              | This study | DKC919  |

**Table S2. CRISPR-Cas9 Protocol & sgRNA Sequences Used for Strain Generation**

| GENOTYPE                                                                                          | METHOD & REFERENCE                             | sgRNA SEQUENCE                              |
|---------------------------------------------------------------------------------------------------|------------------------------------------------|---------------------------------------------|
| <i>knl-1(dha122 (AID::dTagmB&gt;F&gt;P:::KNL-1)III &amp; knl-1(dha130; HA::7XGFP11::knl-1)III</i> | Ribonucleoprotein complex (Paix, et al., 2015) | catatttacagccATGTCGA & CTTACGAGGCTCCATCGACA |
| <i>dhaSi76[ndc-80(dha148; NDC-80::AID::dgfp^3XFLAG)</i>                                           | SEC (Dickinson et al., 2015)                   | ATGTGCTGGCATTGAAAAGG                        |
| <i>dma-1 (dha155; DEL )I</i>                                                                      | Ribonucleoprotein complex (Paix, et al., 2015) | agctagaagcagcaaacgtg & GGTGCTGGTGAATCAATGG  |



## REFERENCES

- 608 1. Jan, Y.N., and Jan, L.Y. (2001). Dendrites. *Genes Dev.* *15*, 2627–2641.
- 609 2. Jan, Y.N., and Jan, L.Y. (2010). Branching out: mechanisms of dendritic arborization.  
610 *Nat. Rev. Neurosci.* *11*, 316–328.
- 611 3. Li, Z., Van Aelst, L., and Cline, H.T. (2000). Rho GTPases regulate distinct aspects of  
612 dendritic arbor growth in *Xenopus* central neurons in vivo. *Nat. Neurosci.* *3*, 217–225.
- 613 4. Luo, L., Hensch, T.K., Ackerman, L., Barbel, S., Jan, L.Y., and Jan, Y.N. (1996).  
614 Differential effects of the Rac GTPase on Purkinje cell axons and dendritic trunks and  
615 spines. *Nature* *379*, 837–840.
- 616 5. Threadgill, R., Bobb, K., and Ghosh, A. (1997). Regulation of dendritic growth and  
617 remodeling by Rho, Rac, and Cdc42. *Neuron* *19*, 625–634.
- 618 6. Nakayama, A.Y., Harms, M.B., and Luo, L. (2000). Small GTPases Rac and Rho in the  
619 maintenance of dendritic spines and branches in hippocampal pyramidal neurons. *J.*  
620 *Neurosci.* *20*, 5329–5338.
- 621 7. Scott, E.K., and Luo, L. (2001). How do dendrites take their shape? *Nat. Neurosci.* *4*,  
622 359–365.
- 623 8. Lefebvre, J.L. (2021). Molecular mechanisms that mediate dendrite morphogenesis.  
624 *Curr. Top. Dev. Biol.* *142*, 233–282.
- 625 9. Sundararajan, L., Stern, J., and Miller, D.M., 3rd (2019). Mechanisms that regulate  
626 morphogenesis of a highly branched neuron in *C. elegans*. *Dev. Biol.* *451*, 53–67.
- 627 10. Taylor, C.A., Yan, J., Howell, A.S., Dong, X., and Shen, K. (2015). RAB-10 Regulates  
628 Dendritic Branching by Balancing Dendritic Transport. *PLoS Genet.* *11*, e1005695.
- 629 11. Maniar, T.A., Kaplan, M., Wang, G.J., Shen, K., Wei, L., Shaw, J.E., Koushika, S.P., and  
630 Bargmann, C.I. (2012). UNC-33 (CRMP) and ankyrin organize microtubules and localize  
631 kinesin to polarize axon-dendrite sorting. *Nat. Neurosci.* *15*, 48–56.
- 632 12. Jaworski, J., Kapitein, L.C., Gouveia, S.M., Dortland, B.R., Wulf, P.S., Grigoriev, I.,  
633 Camera, P., Spangler, S.A., Di Stefano, P., Demmers, J., et al. (2009). Dynamic  
634 microtubules regulate dendritic spine morphology and synaptic plasticity. *Neuron* *61*, 85–  
635 100.
- 636 13. Cao, Y., Lipka, J., Stucchi, R., Burute, M., Pan, X., Portegies, S., Tas, R., Willems, J.,  
637 Will, L., MacGillavry, H., et al. (2020). Microtubule Minus-End Binding Protein CAMSAP2  
638 and Kinesin-14 Motor KIFC3 Control Dendritic Microtubule Organization. *Curr. Biol.* *30*,  
639 899-908.e6.
- 640 14. Kahn, O.I., Schätzle, P., van de Willige, D., Tas, R.P., Lindhout, F.W., Portegies, S.,  
641 Kapitein, L.C., and Hoogenraad, C.C. (2018). APC2 controls dendrite development by  
642 promoting microtubule dynamics. *Nat. Commun.* *9*, 2773.

- 643 15. Nguyen, M.M., McCracken, C.J., Milner, E.S., Goetschius, D.J., Weiner, A.T., Long,  
644 M.K., Michael, N.L., Munro, S., and Rolls, M.M. (2014).  $\Gamma$ -tubulin controls neuronal  
645 microtubule polarity independently of Golgi outposts. *Mol. Biol. Cell* 25, 2039–2050.
- 646 16. Merriam, E.B., Lombard, D.C., Viesselmann, C., Ballweg, J., Stevenson, M., Pietila, L.,  
647 Hu, X., and Dent, E.W. (2011). Dynamic microtubules promote synaptic NMDA receptor-  
648 dependent spine enlargement. *PLoS One* 6, e27688.
- 649 17. Hu, X., Viesselmann, C., Nam, S., Merriam, E., and Dent, E.W. (2008). Activity-  
650 dependent dynamic microtubule invasion of dendritic spines. *J. Neurosci.* 28, 13094–  
651 13105.
- 652 18. Cheerambathur, D.K., and Desai, A. (2014). Linked in: formation and regulation of  
653 microtubule attachments during chromosome segregation. *Curr. Opin. Cell Biol.* 26, 113–  
654 122.
- 655 19. Musacchio, A., and Desai, A. (2017). A Molecular View of Kinetochore Assembly and  
656 Function. *Biology* 6, 5.
- 657 20. Cheerambathur, D.K., Prevo, B., Chow, T.-L., Hattersley, N., Wang, S., Zhao, Z., Kim,  
658 T., Gerson-Gurwitz, A., Oegema, K., Green, R., et al. (2019). The Kinetochore-  
659 Microtubule Coupling Machinery Is Repurposed in Sensory Nervous System  
660 Morphogenesis. *Dev. Cell* 48, 864-872.e7.
- 661 21. Zhao, G., Oztan, A., Ye, Y., and Schwarz, T.L. (2019). Kinetochore Proteins Have a Post-  
662 Mitotic Function in Neurodevelopment. *Dev. Cell* 48, 873-882.e4.
- 663 22. Hertzler, J.I., Simonovitch, S.I., Albertson, R.M., Weiner, A.T., Nye, D.M.R., and Rolls,  
664 M.M. (2020). Kinetochore proteins suppress neuronal microtubule dynamics and  
665 promote dendrite regeneration. *Mol. Biol. Cell* 31, 2125–2138.
- 666 23. Smith, C.J., Watson, J., Spencer, W.C., O'Brien, T., Cha, B., Albeg, A., Treinin, M., and  
667 Miller, D.M., III (2010). Time-lapse imaging and cell-specific expression profiling reveal  
668 dynamic branching and molecular determinants of a multi-dendritic nociceptor in *C.*  
669 *elegans*. *Dev. Biol.* 345, 18–33.
- 670 24. Kamiyama, D., Sekine, S., Barsi-Rhyne, B., Hu, J., Chen, B., Gilbert, L.A., Ishikawa, H.,  
671 Leonetti, M.D., Marshall, W.F., Weissman, J.S., et al. (2016). Versatile protein tagging in  
672 cells with split fluorescent protein. *Nat. Commun.* 7, 929.
- 673 25. Nishimura, K., Fukagawa, T., Takisawa, H., Kakimoto, T., and Kanemaki, M. (2009). An  
674 auxin-based degron system for the rapid depletion of proteins in nonplant cells. *Nat.*  
675 *Methods* 6, 917–922.
- 676 26. Ashley, G.E., Duong, T., Levenson, M.T., Martinez, M.A.Q., Johnson, L.C., Hibshman,  
677 J.D., Saeger, H.N., Palmisano, N.J., Doonan, R., Martinez-Mendez, R., et al. (2021). An  
678 expanded auxin-inducible degron toolkit for *Caenorhabditis elegans*. *Genetics* 217.  
679 10.1093/genetics/iyab006.



- 680 27. Liao, C.-P., Li, H., Lee, H.-H., Chien, C.-T., and Pan, C.-L. (2018). Cell-Autonomous  
681 Regulation of Dendrite Self-Avoidance by the Wnt Secretory Factor MIG-14/Wntless.  
682 *Neuron* 98, 320-334.e6.
- 683 28. E, L., Zhou, T., Koh, S., Chuang, M., Sharma, R., Pujol, N., Chisholm, A.D., Eroglu, C.,  
684 Matsunami, H., and Yan, D. (2018). An Antimicrobial Peptide and Its Neuronal Receptor  
685 Regulate Dendrite Degeneration in Aging and Infection. *Neuron* 97, 125-138.e5.
- 686 29. He, L., Kooistra, R., Das, R., Oudejans, E., van Leen, E., Ziegler, J., Portegies, S., de  
687 Haan, B., van Regteren Altena, A., Stucchi, R., et al. (2020). Cortical anchoring of the  
688 microtubule cytoskeleton is essential for neuron polarity. *Elife* 9. 10.7554/eLife.55111.
- 689 30. He, L., van Beem, L., Snel, B., Hoogenraad, C.C., and Harterink, M. (2022). PTRN-1  
690 (CAMSAP) and NOCA-2 (NINEIN) are required for microtubule polarity in *Caenorhabditis*  
691 *elegans* dendrites. *PLoS Biol.* 20, e3001855.
- 692 31. Harterink, M., Edwards, S.L., de Haan, B., Yau, K.W., van den Heuvel, S., Kapitein, L.C.,  
693 Miller, K.G., and Hoogenraad, C.C. (2018). Local microtubule organization promotes  
694 cargo transport in *C. elegans* dendrites. *J. Cell Sci.* 131, jcs223107.
- 695 32. Zou, W., Dong, X., Broederdorf, T.R., Shen, A., Kramer, D.A., Shi, R., Liang, X., Miller,  
696 D.M., III, Xiang, Y.K., Yasuda, R., et al. (2018). A Dendritic Guidance Receptor Complex  
697 Brings Together Distinct Actin Regulators to Drive Efficient F-Actin Assembly and  
698 Branching. *Dev. Cell* 45, 362-375.e3.
- 699 33. Tang, L.T., Diaz-Balzac, C.A., Rahman, M., Ramirez-Suarez, N.J., Salzberg, Y., Lázaro-  
700 Peña, M.I., and Bülow, H.E. (2019). TIAM-1/GEF can shape somatosensory dendrites  
701 independently of its GEF activity by regulating F-actin localization. *Elife* 8.  
702 10.7554/eLife.38949.
- 703 34. Yan, J., Chao, D.L., Toba, S., Koyasako, K., Yasunaga, T., Hirotsune, S., and Shen, K.  
704 (2013). Kinesin-1 regulates dendrite microtubule polarity in *Caenorhabditis elegans*. *Elife*  
705 2, 153.
- 706 35. Sundararajan, L., Smith, C.J., Watson, J.D., Millis, B.A., Tyska, M.J., and Miller, D.M.,  
707 3rd (2019). Actin assembly and non-muscle myosin activity drive dendrite retraction in  
708 an UNC-6/Netrin dependent self-avoidance response. *PLoS Genet.* 15, e1008228.
- 709 36. Cheng, L., Zhang, J., Ahmad, S., Rozier, L., Yu, H., Deng, H., and Mao, Y. (2011). Aurora  
710 B regulates formin mDia3 in achieving metaphase chromosome alignment. *Dev. Cell* 20,  
711 342–352.
- 712 37. Mogessie, B., and Schuh, M. (2017). Actin protects mammalian eggs against  
713 chromosome segregation errors. *Science* 357. 10.1126/science.aal1647.
- 714 38. Yasuda, S., Ocegüera-Yanez, F., Kato, T., Okamoto, M., Yonemura, S., Terada, Y.,  
715 Ishizaki, T., and Narumiya, S. (2004). Cdc42 and mDia3 regulate microtubule attachment  
716 to kinetochores. *Nature* 428, 767–771.

- 717 39. Harasimov, K., Uraji, J., Mönnich, E.U., Holubcová, Z., Elder, K., Blayney, M., and Schuh,  
718 M. (2023). Actin-driven chromosome clustering facilitates fast and complete  
719 chromosome capture in mammalian oocytes. *Nat. Cell Biol.* 10.1038/s41556-022-01082-  
720 9.
- 721 40. Frøkjaer-Jensen, C., Davis, M.W., Hopkins, C.E., Newman, B.J., Thummel, J.M.,  
722 Olesen, S.-P., Grunnet, M., and Jorgensen, E.M. (2008). Single-copy insertion of  
723 transgenes in *Caenorhabditis elegans*. *Nat. Genet.* 40, 1375–1383.
- 724 41. Dickinson, D.J., Ward, J.D., Reiner, D.J., and Goldstein, B. (2013). Engineering the  
725 *Caenorhabditis elegans* genome using Cas9-triggered homologous recombination. *Nat.*  
726 *Methods* 10, 1028–1034.
- 727 42. Waaijers, S., Portegijs, V., Kerver, J., Lemmens, B.B.L.G., Tijsterman, M., van den  
728 Heuvel, S., and Boxem, M. (2013). CRISPR/Cas9-Targeted Mutagenesis in  
729 *Caenorhabditis elegans*. *Genetics* 195, 1187–1191.
- 730 43. Paix, A., Folkmann, A., Rasoloson, D., and Seydoux, G. (2015). High Efficiency,  
731 Homology-Directed Genome Editing in *Caenorhabditis elegans* Using CRISPR-Cas9  
732 Ribonucleoprotein Complexes. *Genetics* 201, 47–54.
- 733 44. Gibson, D.G., Young, L., Chuang, R.-Y., Venter, J.C., Hutchison, C.A., and Smith, H.O.  
734 (2009). Enzymatic assembly of DNA molecules up to several hundred kilobases. *Nat.*  
735 *Methods* 6, 343–345.
- 736 45. Mangeol, P., Prevo, B., and Peterman, E.J.G. (2016). KymographClear and  
737 KymographDirect: two tools for the automated quantitative analysis of molecular and  
738 cellular dynamics using kymographs. *Mol. Biol. Cell* 27, 1948–1957.
